# Supplementary material
Source: MDPI journal article supplement (https://www.mdpi.com/2073-4433/15/4/498)
Supplement: s1 [file s1]

**Table S1.** RMSE between modeled and measured vTEC values for the year 2008. The model with the best performance is bolded. Measurements from Swarm A were unavailable in 2008.

| vTEC RMSE (TECU) - 2008 |                  |                              |                               |                          |                                          |                                        |
|-------------------------|------------------|------------------------------|-------------------------------|--------------------------|------------------------------------------|----------------------------------------|
| Satellite               | Dataset          | IRI-<br>NeQuick<br>(g=0.125) | NeQuick-<br>corr<br>(g=0.125) | NeQuick-<br>corr (g=1.5) | NeQuick-<br>corr<br>Lomidze<br>(g=0.125) | NeQuick-<br>corr<br>Lomidze<br>(g=1.4) |
| GRACE                   | Global           | 2.330                        | 2.380                         | <b>1.869</b>             | 2.130                                    | 1.939                                  |
|                         | High latitudes   | 1.000                        | 1.083                         | <b>0.875</b>             | 0.979                                    | 0.878                                  |
|                         | Middle latitudes | 2.156                        | 2.137                         | <b>1.465</b>             | 1.919                                    | 1.525                                  |
|                         | Low latitudes    | 3.145                        | 3.200                         | <b>2.680</b>             | 2.835                                    | 2.764                                  |
| Swarm A                 | Global           |                              |                               |                          |                                          |                                        |
|                         | High latitudes   |                              |                               |                          |                                          |                                        |
|                         | Middle latitudes |                              |                               |                          |                                          |                                        |
|                         | Low latitudes    |                              |                               |                          |                                          |                                        |
| TerraSAR-X              | Global           | 2.107                        | 2.136                         | <b>1.599</b>             | 1.925                                    | 1.681                                  |
|                         | High latitudes   | 0.778                        | 0.851                         | 1.029                    | <b>0.849</b>                             | 0.999                                  |
|                         | Middle latitudes | 1.824                        | 1.729                         | <b>1.220</b>             | 1.557                                    | 1.264                                  |
|                         | Low latitudes    | 2.911                        | 2.998                         | <b>2.210</b>             | 2.669                                    | 2.343                                  |
| COSMIC-1                | Global           | 3.517                        | 3.228                         | <b>2.644</b>             | 3.069                                    | 2.718                                  |
|                         | High latitudes   | 2.140                        | 1.912                         | 2.111                    | <b>1.889</b>                             | 2.039                                  |
|                         | Middle latitudes | 3.055                        | 2.797                         | <b>2.472</b>             | 2.704                                    | 2.513                                  |
|                         | Low latitudes    | 4.455                        | 4.086                         | <b>3.037</b>             | 3.817                                    | 3.179                                  |
| METOP                   | Global           | 2.838                        | 2.863                         | <b>2.012</b>             | 2.715                                    | 2.192                                  |
|                         | High latitudes   | 1.269                        | 1.170                         | <b>0.794</b>             | 1.083                                    | 0.883                                  |
|                         | Middle latitudes | 2.377                        | 2.313                         | <b>1.619</b>             | 2.202                                    | 1.777                                  |
|                         | Low latitudes    | 3.974                        | 3.992                         | <b>2.815</b>             | 3.753                                    | 3.037                                  |

**Table S2.** RMSE between modeled and measured vTEC values for the year 2011. The model with the best performance is bolded. Measurements from Swarm A were unavailable in 2011.

| vTEC RMSE (TECU) - 2011 |                  |                          |                               |                          |                                          |                                        |
|-------------------------|------------------|--------------------------|-------------------------------|--------------------------|------------------------------------------|----------------------------------------|
| Satellite               | Dataset          | IRI-NeQuick<br>(g=0.125) | NeQuick-<br>corr<br>(g=0.125) | NeQuick-<br>corr (g=1.5) | NeQuick-<br>corr<br>Lomidze<br>(g=0.125) | NeQuick-<br>corr<br>Lomidze<br>(g=1.4) |
| GRACE                   | Global           | 4.467                    | 3.332                         | <b>2.281</b>             | 2.746                                    | 2.296                                  |
|                         | High latitudes   | 2.586                    | 2.907                         | 2.117                    | 2.534                                    | <b>2.088</b>                           |
|                         | Middle latitudes | 2.911                    | 3.154                         | 1.918                    | 2.529                                    | <b>1.866</b>                           |
|                         | Low latitudes    | 6.725                    | 3.981                         | <b>2.916</b>             | 3.259                                    | 3.036                                  |
| Swarm A                 | Global           |                          |                               |                          |                                          |                                        |
|                         | High latitudes   |                          |                               |                          |                                          |                                        |
|                         | Middle latitudes |                          |                               |                          |                                          |                                        |
|                         | Low latitudes    |                          |                               |                          |                                          |                                        |
| TerraSAR-X              | Global           | 2.578                    | 2.481                         | <b>1.603</b>             | 2.130                                    | 1.703                                  |
|                         | High latitudes   | 1.432                    | 1.752                         | <b>1.257</b>             | 1.569                                    | 1.287                                  |
|                         | Middle latitudes | 1.895                    | 2.186                         | <b>1.283</b>             | 1.865                                    | 1.353                                  |
|                         | Low latitudes    | 3.741                    | 3.324                         | <b>2.216</b>             | 2.837                                    | 2.386                                  |
| COSMIC-1                | Global           | 4.167                    | 4.190                         | <b>2.815</b>             | 3.885                                    | 3.032                                  |
|                         | High latitudes   | 3.294                    | 3.476                         | <b>2.531</b>             | 3.281                                    | 2.691                                  |
|                         | Middle latitudes | 3.671                    | 3.945                         | <b>2.631</b>             | 3.669                                    | 2.851                                  |
|                         | Low latitudes    | 5.096                    | 5.017                         | <b>3.294</b>             | 4.606                                    | 3.543                                  |
| METOP                   | Global           | 2.591                    | 2.742                         | <b>1.574</b>             | 2.430                                    | 1.700                                  |
|                         | High latitudes   | 1.560                    | 1.653                         | <b>1.068</b>             | 1.493                                    | 1.107                                  |
|                         | Middle latitudes | 2.196                    | 2.421                         | <b>1.413</b>             | 2.180                                    | 1.542                                  |
|                         | Low latitudes    | 3.509                    | 3.879                         | <b>2.146</b>             | 3.387                                    | 2.322                                  |

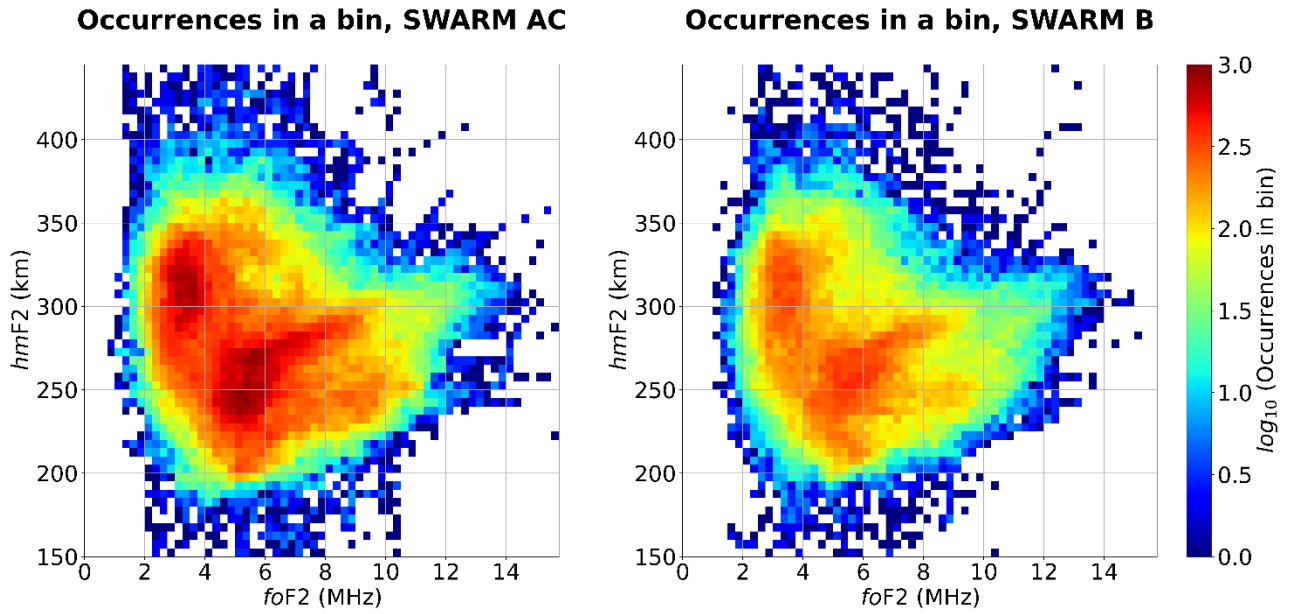

**Figure S1.** With reference to Figure 1 of the paper, these plots show the occurrences of values in each bin when considering the period from 5 December 2013 to 31 December 2018.

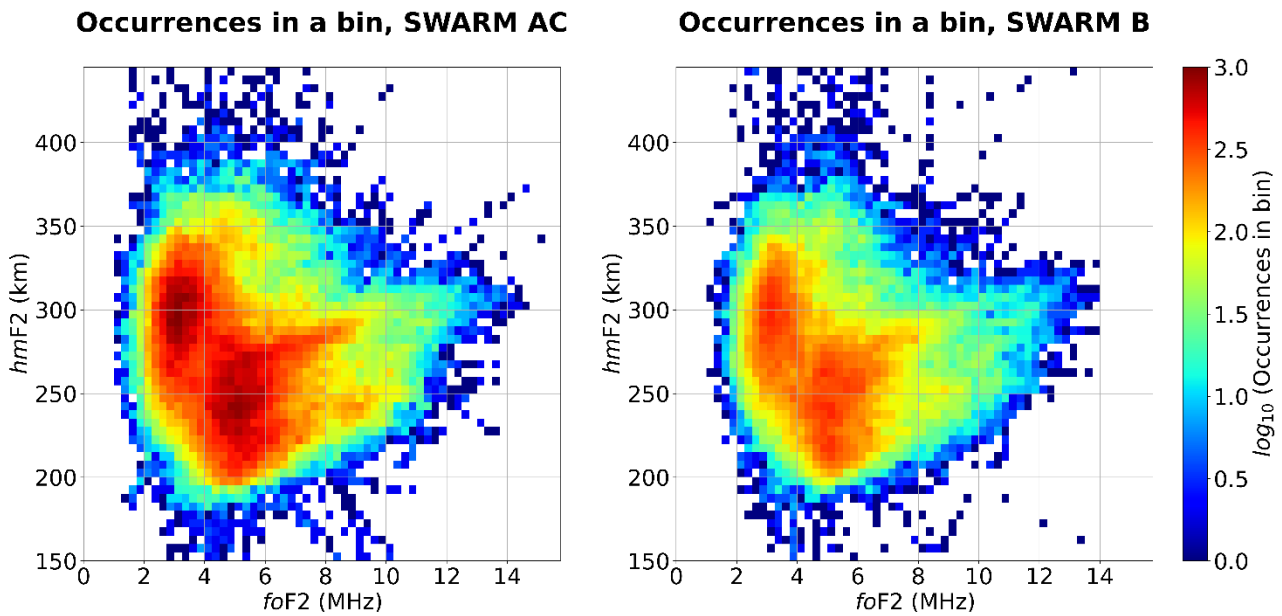

**Figure S2.** With reference to Figure 3 of the paper, these plots show the occurrences of values in each bin when considering the period from 5 December 2013 to 31 December 2021.

# GRACE vTEC dataset, year 2014, joint probability distributions between measured and modeled data

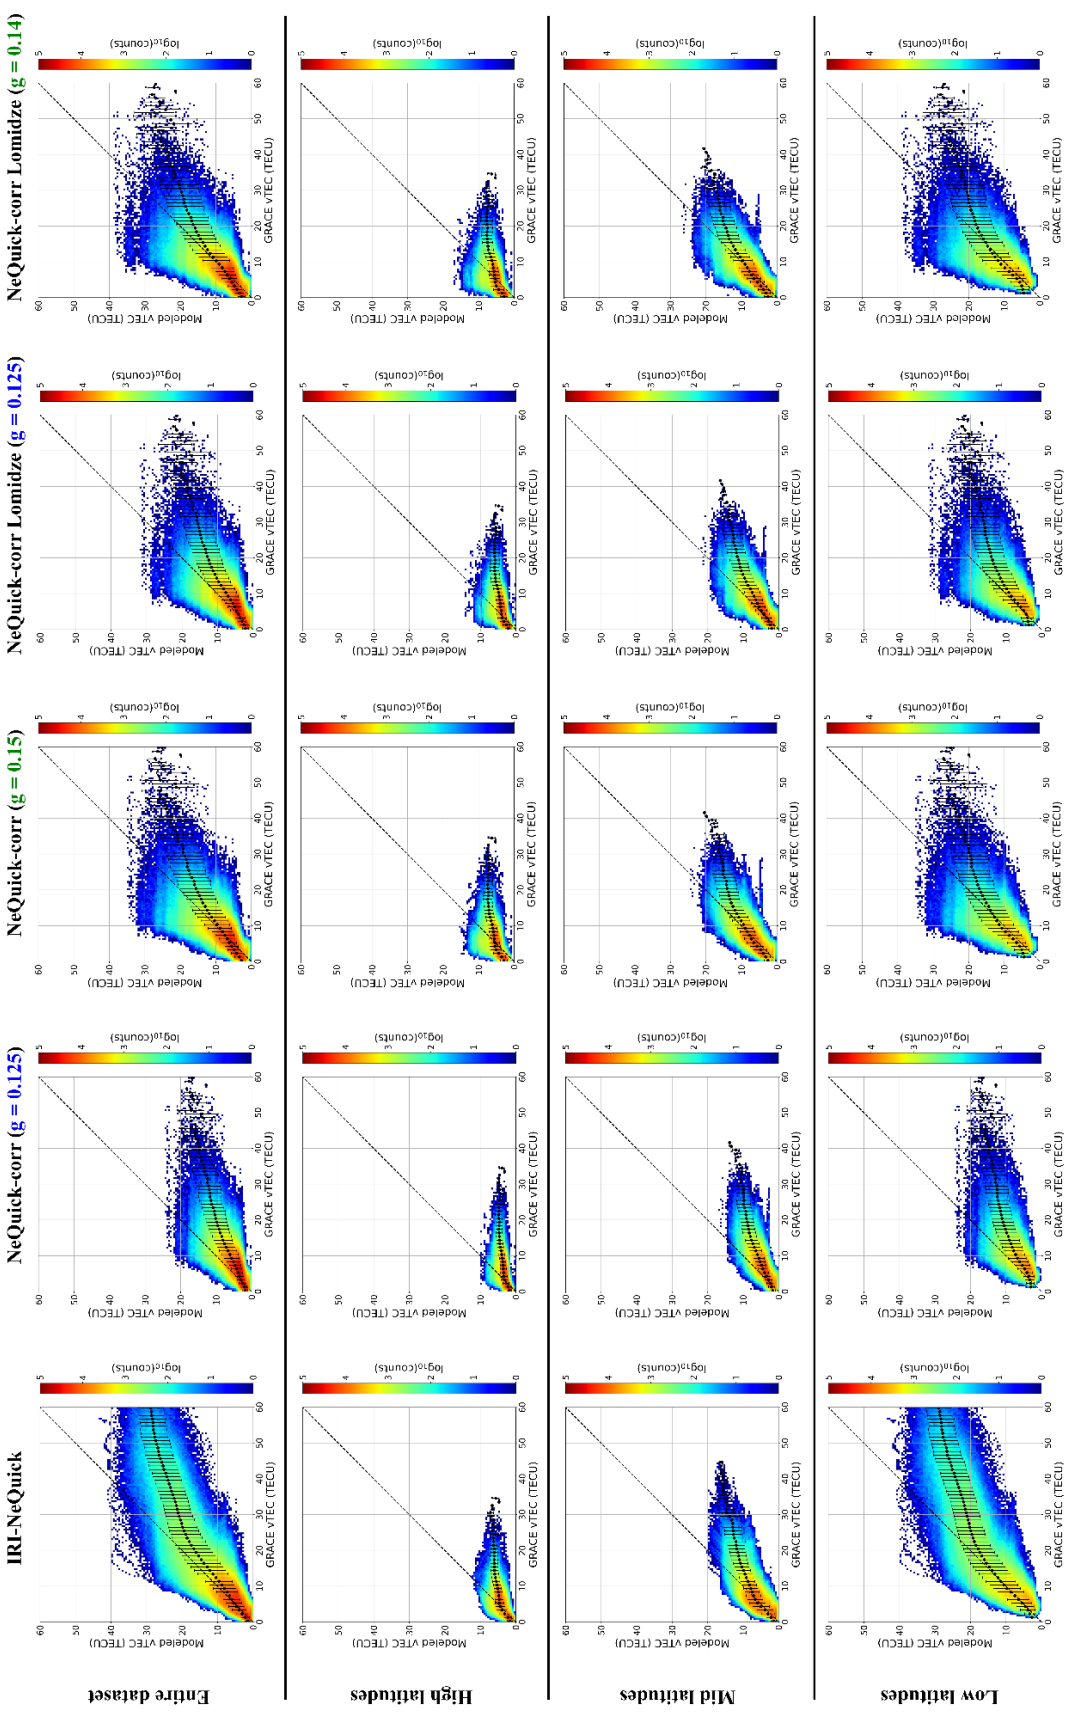

**Figure S3.** Joint probability distributions between measured and modeled vTEC values for 2014. Measured values are those from the GRACE mission. Modeled values are those from the five NeQuick topside descriptions considered in the study. The black dots refer to the mean of modeled values conditioned by GRACE observations, with the corresponding standard deviation as error bars. The NeQuick-corr options (with  $g = 0.15$  and  $0.14$ ) reduce the underestimation of VTEC compared to the options with  $g = 0.125$ .

# Swarm A vTEC dataset, year 2014, joint probability distributions between measured and modeled data

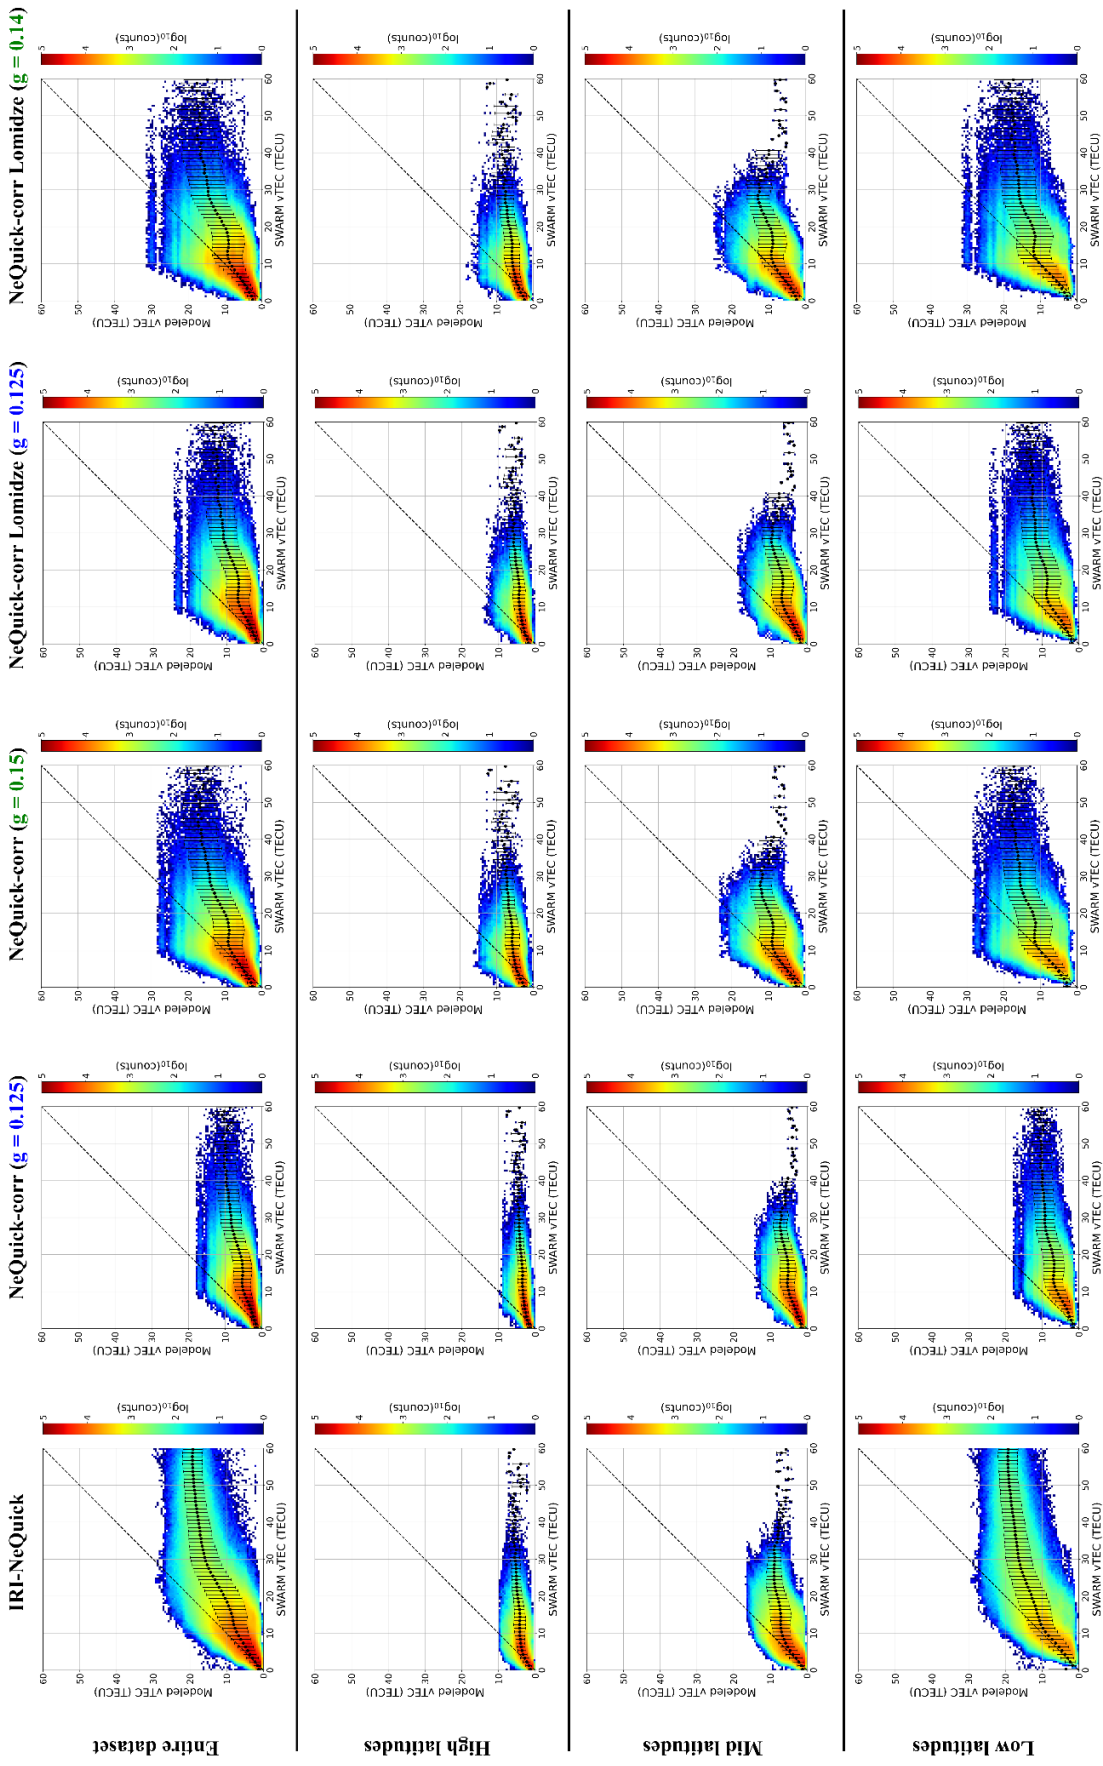

**Figure S4.** Joint probability distributions between measured and modeled vTEC values for 2014. Measured values are those from the Swarm A satellite. Modeled values are those from the five NeQuick topside descriptions considered in the study. The black dots refer to the mean of modeled values conditioned by Swarm A observations, with the corresponding standard deviation as error bars. The NeQuick-corr options (with  $g = 0.15$  and  $0.14$ ) reduce the underestimation of vTEC compared to the options with  $g = 0.125$ .

# COSMIC-1 vTEC dataset, year 2014, joint probability distributions between measured and modeled data

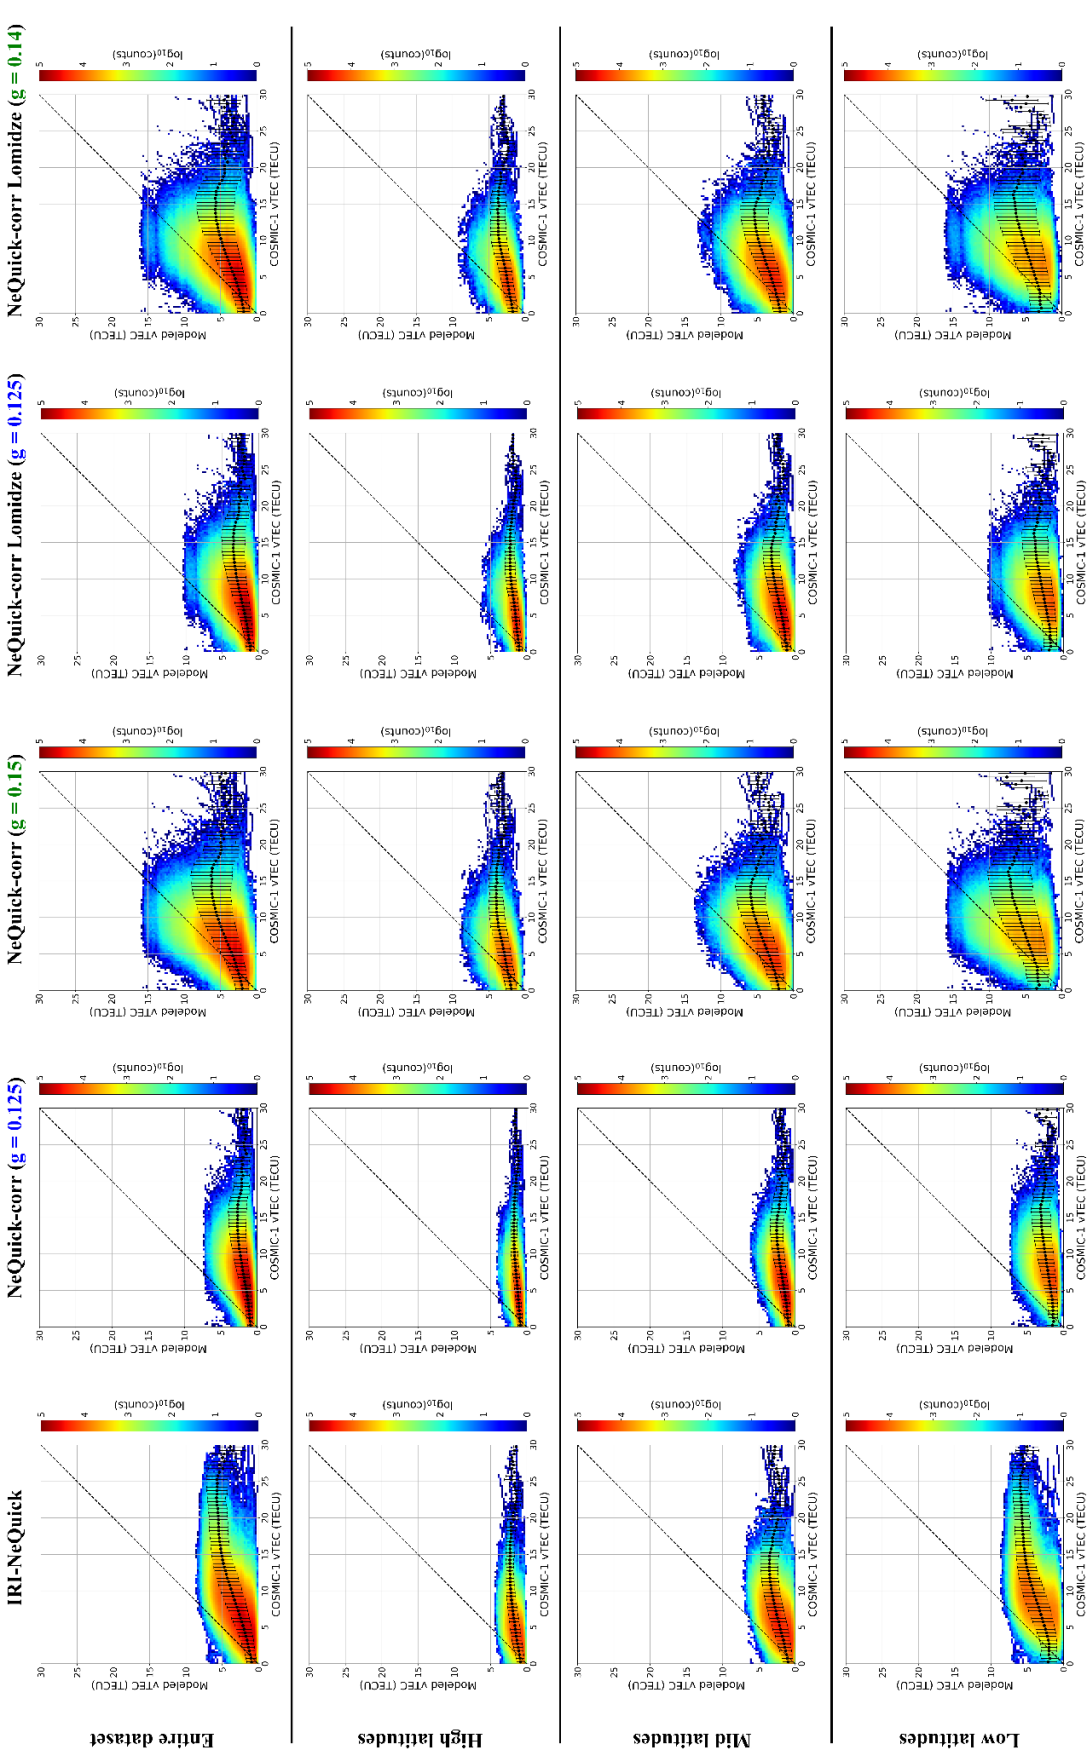

**Figure S5.** Joint probability distributions between measured and modeled vTEC values for 2014. Measured values are those from the COSMIC-1 mission. Modeled values are those from the five NeQuick topside descriptions considered in the study. The black dots refer to the mean of modeled values conditioned by COSMIC-1 observations, with the corresponding standard deviation as error bars. The NeQuick-corr options (with  $g = 0.15$  and  $0.14$ ) reduce the underestimation of VTEC compared to the options with  $g = 0.125$ .



## GRACE vTEC dataset, year 2014, histograms of residuals between measured and modeled data

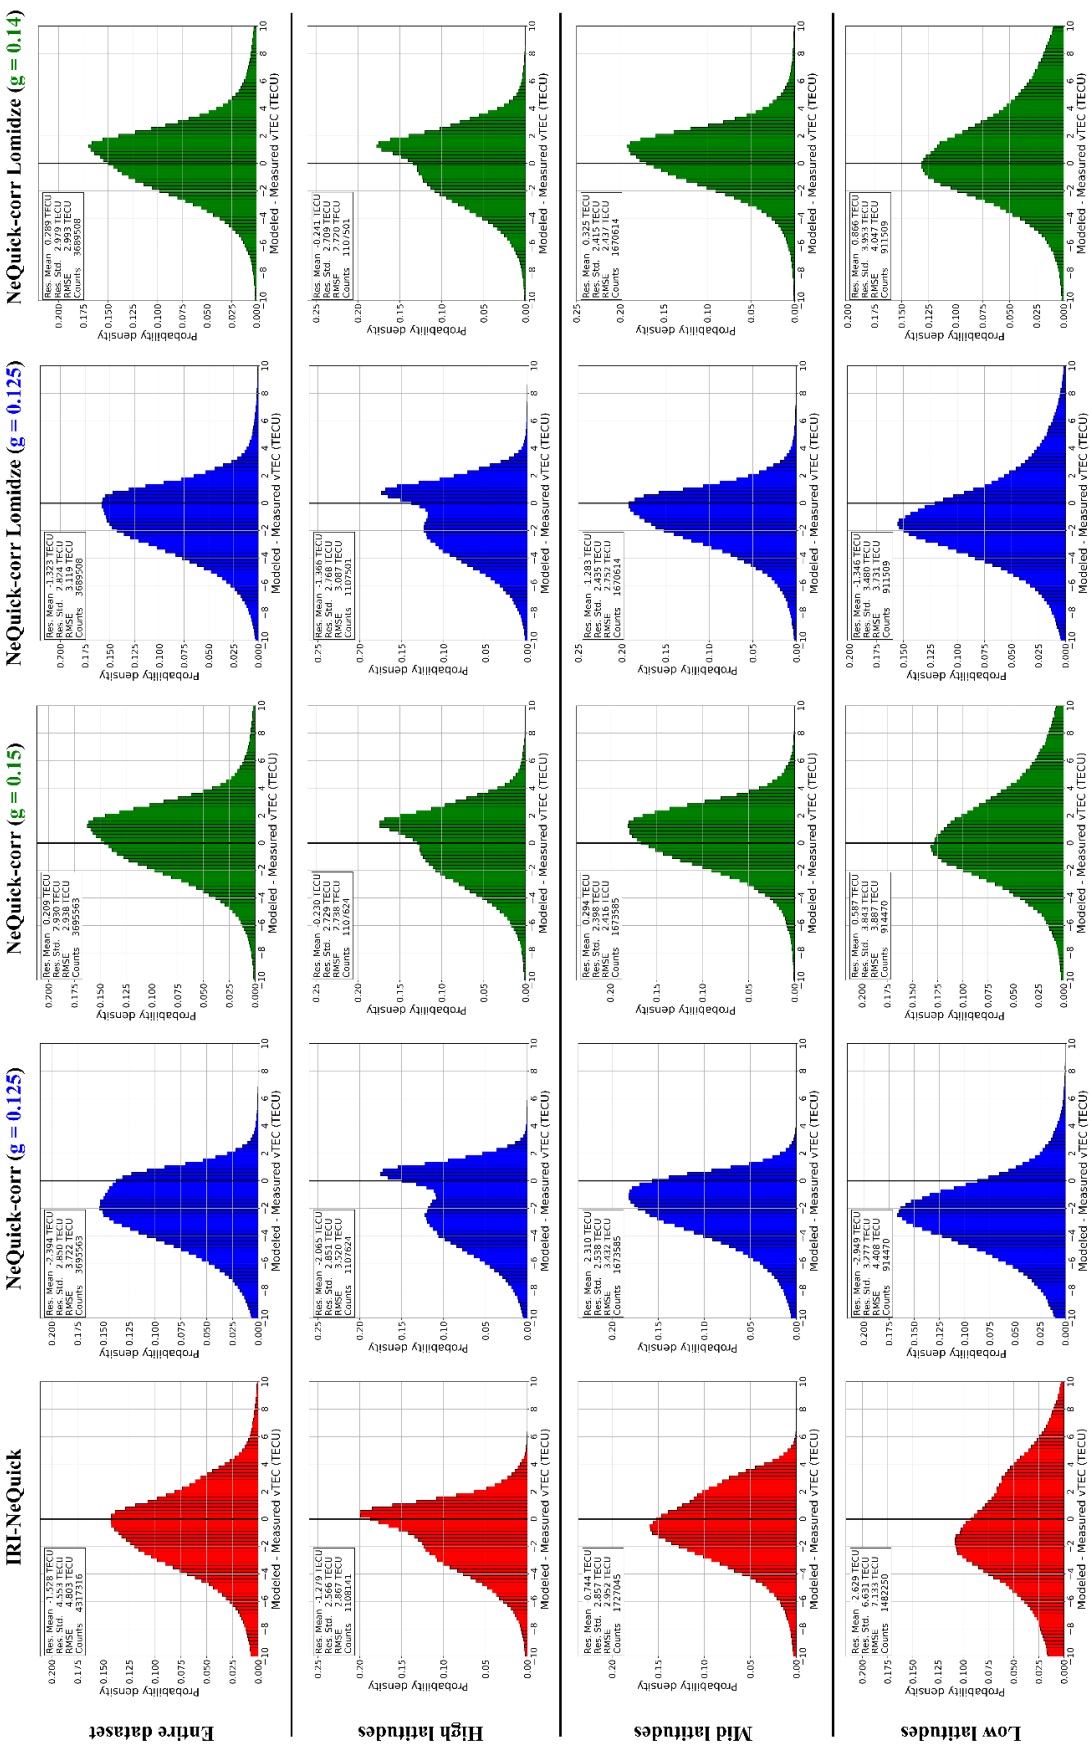

**Figure S6.** Distributions of residuals between measured and modeled vTEC values for 2014. Measured values are those from the GRACE mission. Modeled values are those from the five NeQuick topside descriptions considered in the study. In the upper left corner of each plot, the residuals mean, the residuals standard deviation, the RMSE and the counts are visible. The NeQuick-corr options (with  $g = 0.15$  and  $0.14$ ) reduce the underestimation of VTEC compared to the options with  $g = 0.125$  (green versus blue histograms).

## Swarm A vTEC dataset, year 2014, histograms of residuals between measured and modeled data

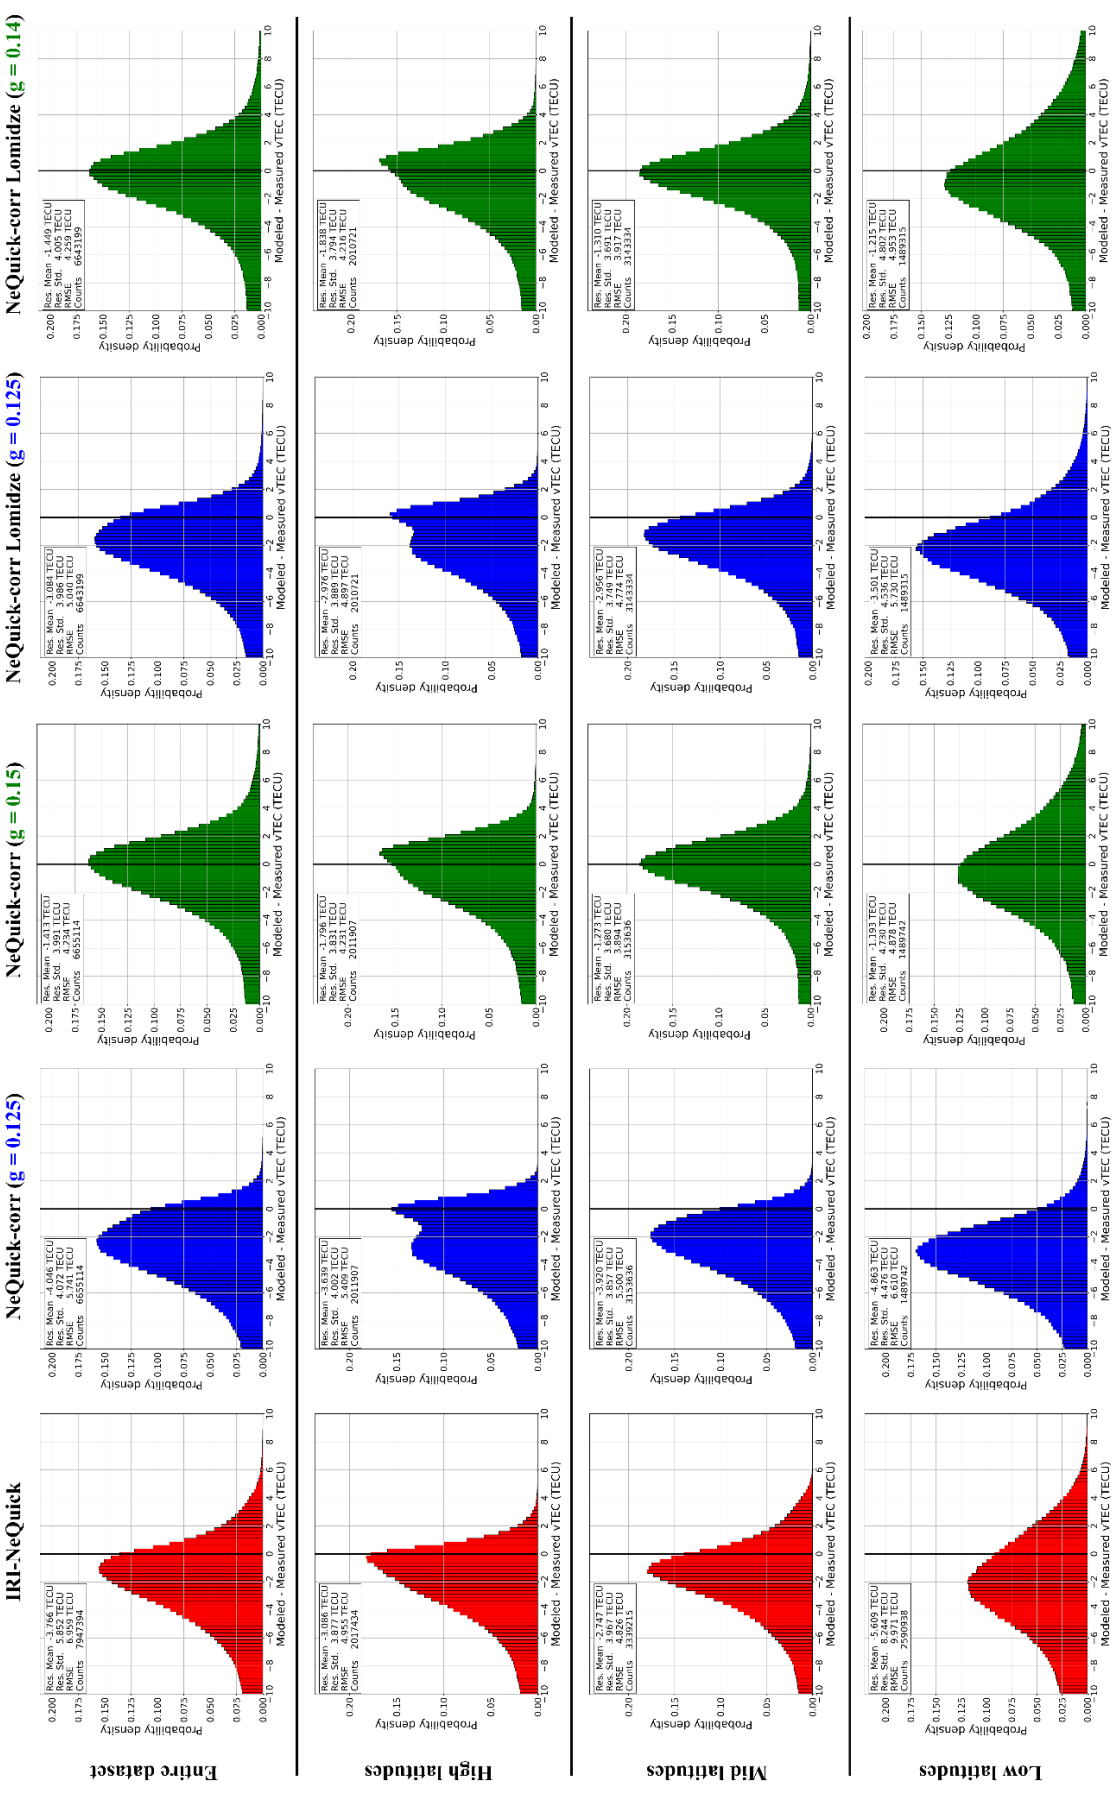

**Figure S7.** Distributions of residuals between measured and modeled vTEC values for 2014. Measured values are those from the Swarm A satellite. Modeled values are those from the five NeQuick topside descriptions considered in the study. In the upper left corner of each plot, the residuals mean, the residuals standard deviation, the RMSE and the counts are visible. The NeQuick-corr options (with  $g = 0.15$  and  $0.14$ ) reduce the underestimation of VTEC compared to the options with  $g = 0.125$  (green versus blue histograms).



# COSMIC-1 vTEC dataset, year 2014, histograms of residuals between measured and modeled data

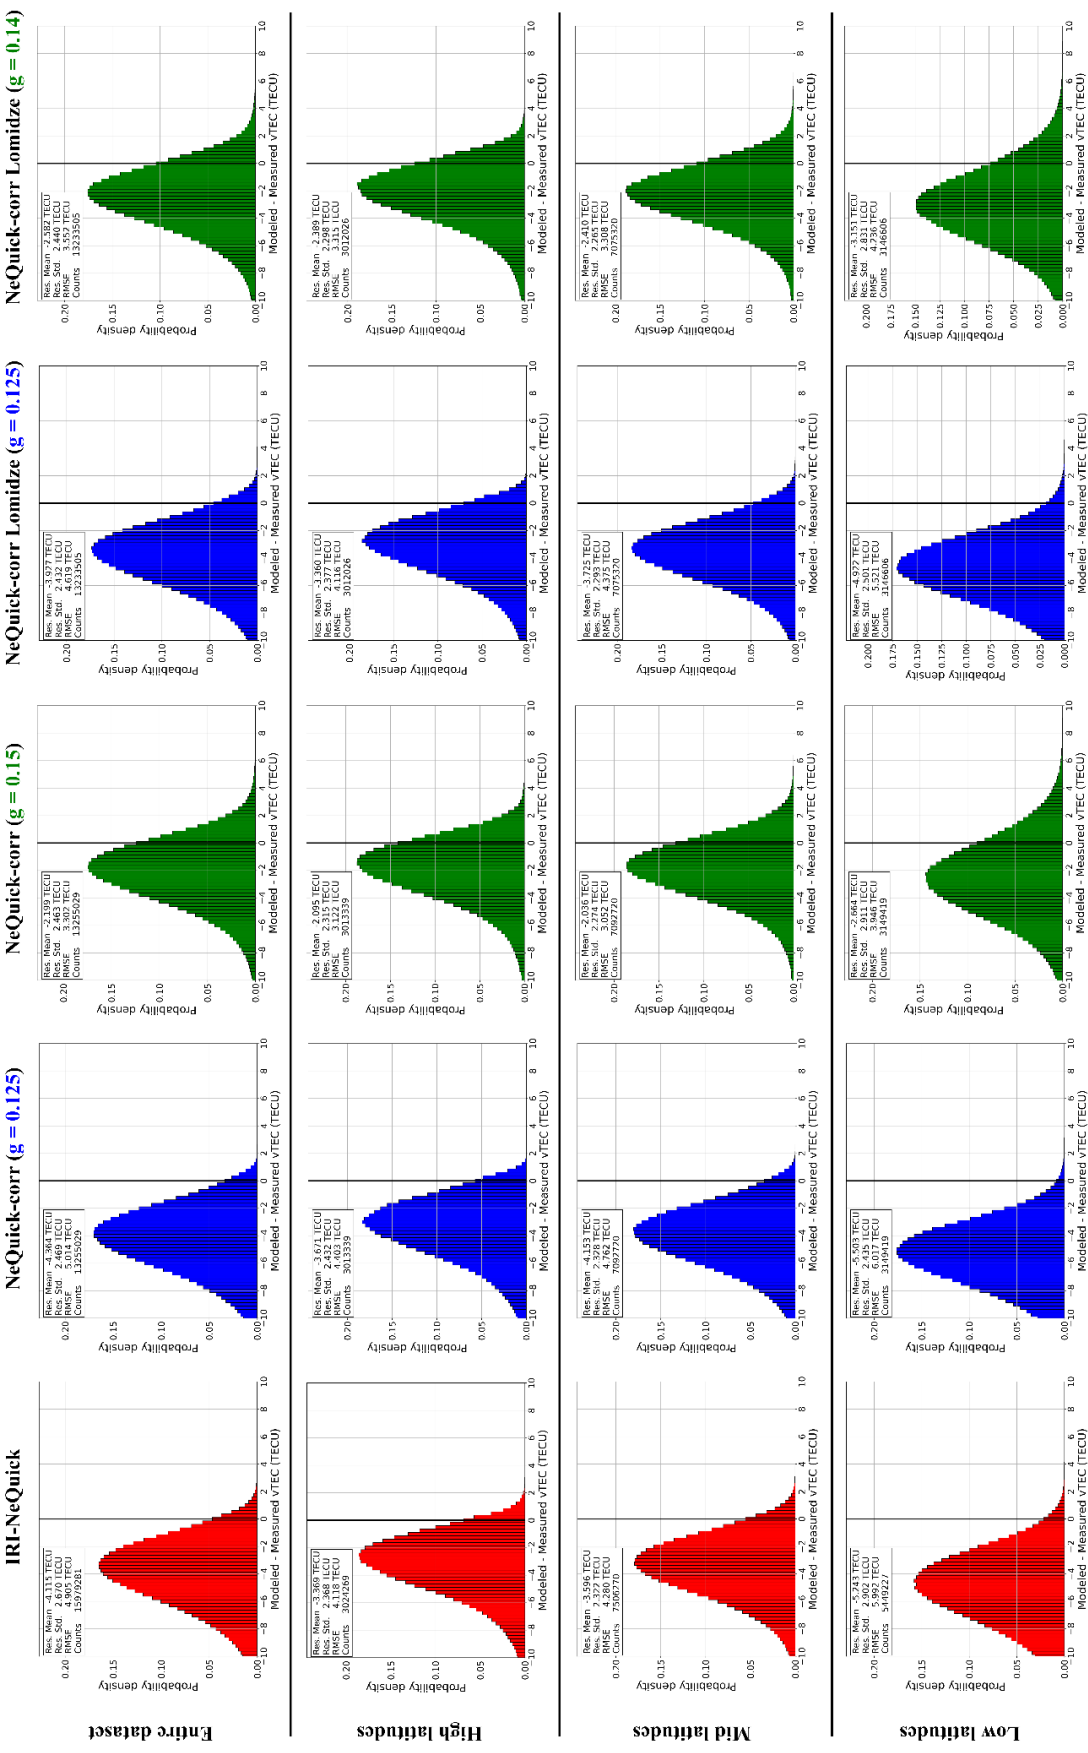

**Figure S8.** Distributions of residuals between measured and modeled vTEC values for 2014. Measured values are those from the COSMIC-1 mission. Modeled values are those from the five NeQuick topside descriptions considered in the study. In the upper left corner of each plot, the residuals mean, the residuals standard deviation, the RMSE and the counts are visible. The NeQuick-corr options (with  $g = 0.15$  and  $0.14$ ) reduce the underestimation of VTEC compared to the options with  $g = 0.125$  (green versus blue histograms).

# TerraSAR-X vTEC dataset, year 2008, joint probability distributions between measured and modeled data

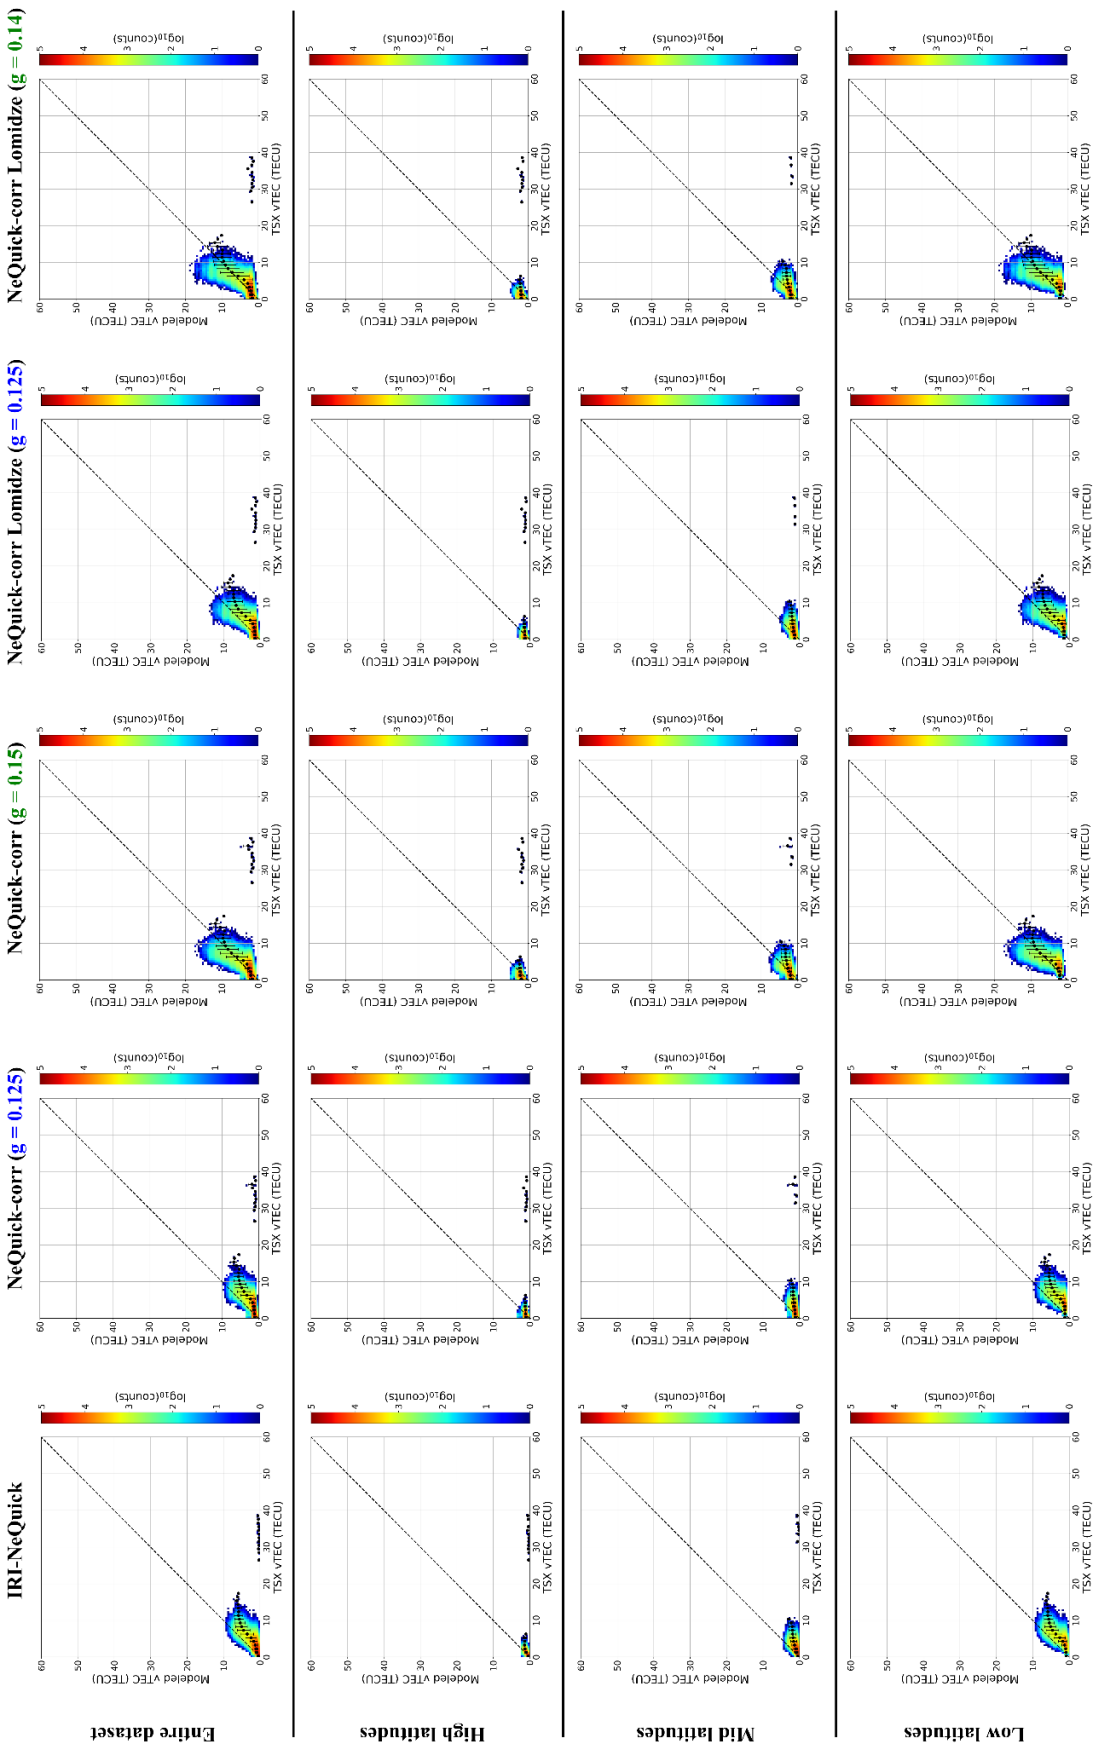

**Figure S9.** Joint probability distributions between measured and modeled vTEC values for 2008. Measured values are those from the TerraSAR-X mission. Modeled values are those from the five NeQuick topside descriptions considered in the study. The black dots refer to the mean of modeled values conditioned by TerraSAR-X observations, with the corresponding standard deviation as error bars. The NeQuick-corr options (with  $g = 0.15$  and 0.14) reduce the underestimation of VTEC compared to the options with  $g = 0.125$ .

# METOP vTEC dataset, year 2008, joint probability distributions between measured and modeled data

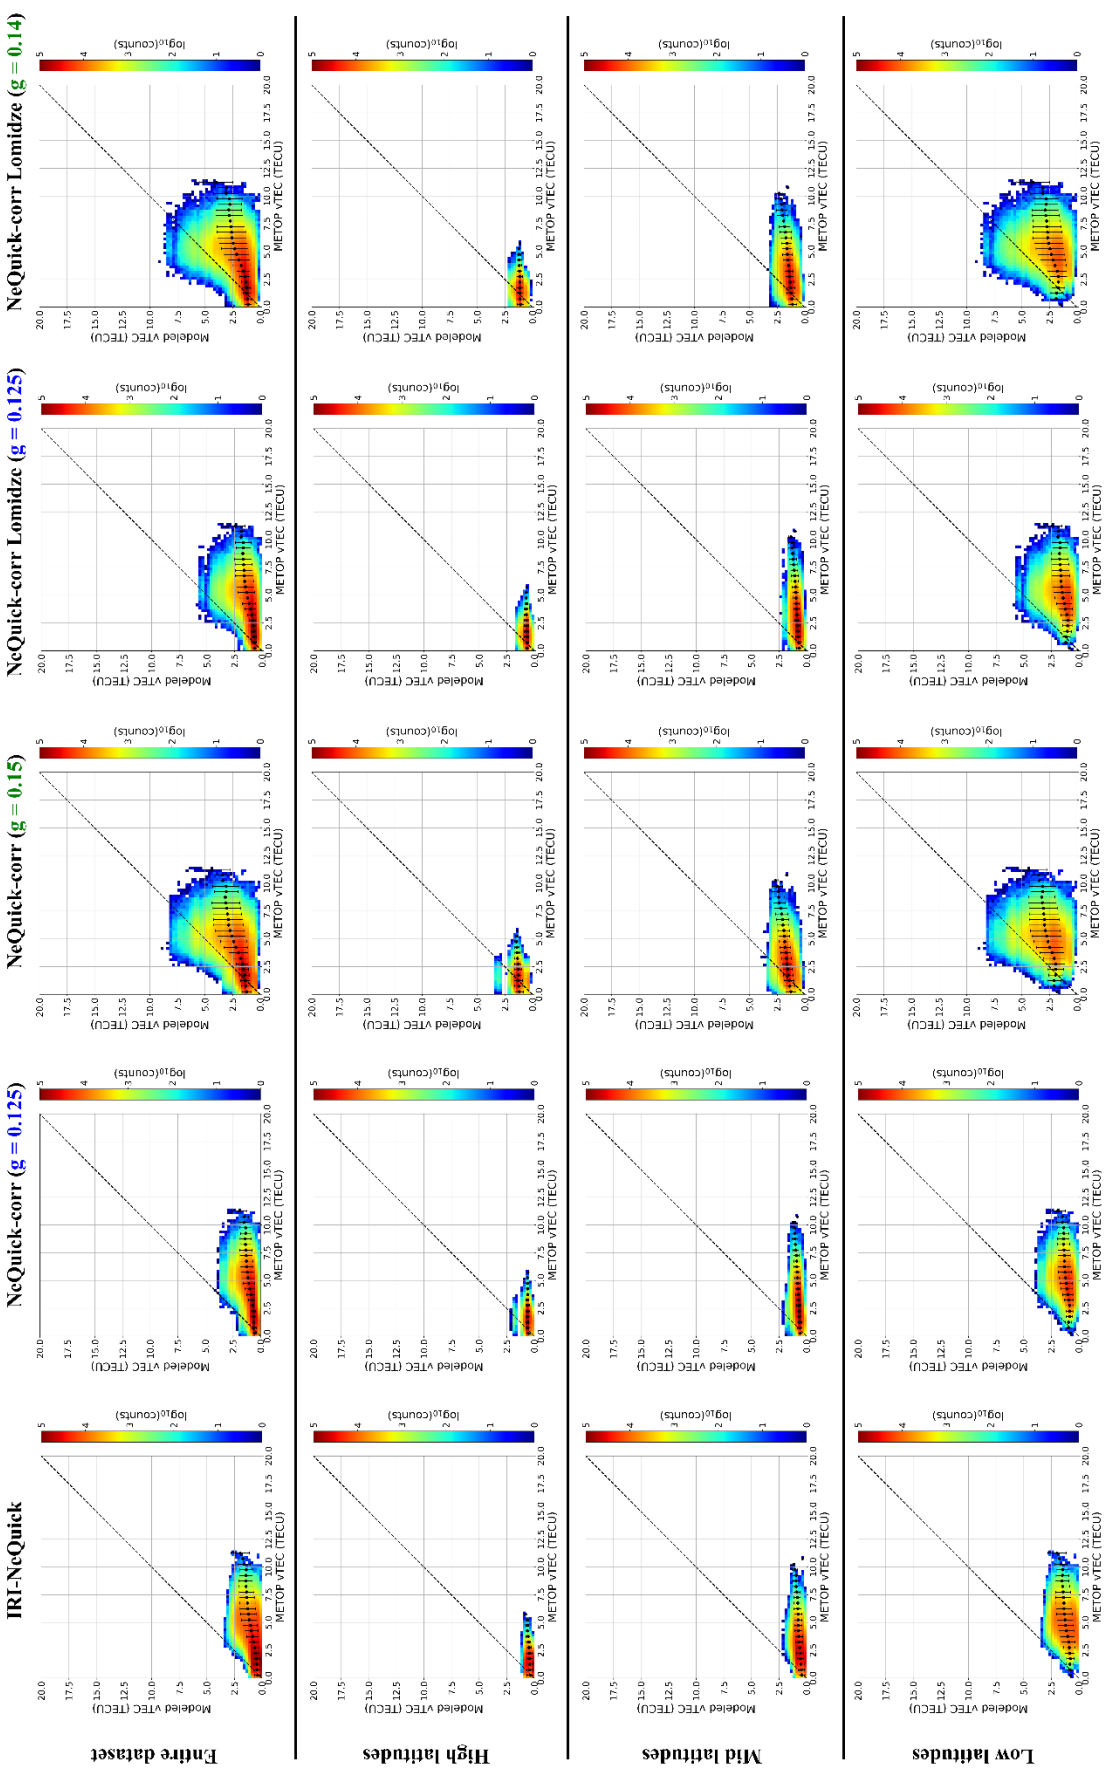

**Figure S10.** Joint probability distributions between measured and modeled vTEC values are those from the METOP mission. Modeled values are those from the five NeQuick topside descriptions considered in the study. The black dots refer to the mean of modeled values conditioned by METOP observations, with the corresponding standard deviation as error bars. The NeQuick-corr options (with  $g = 0.15$  and 0.14) reduce the underestimation of VTEC compared to the options with  $g = 0.125$ .

# GRACE vTEC dataset, year 2008, joint probability distributions between measured and modeled data

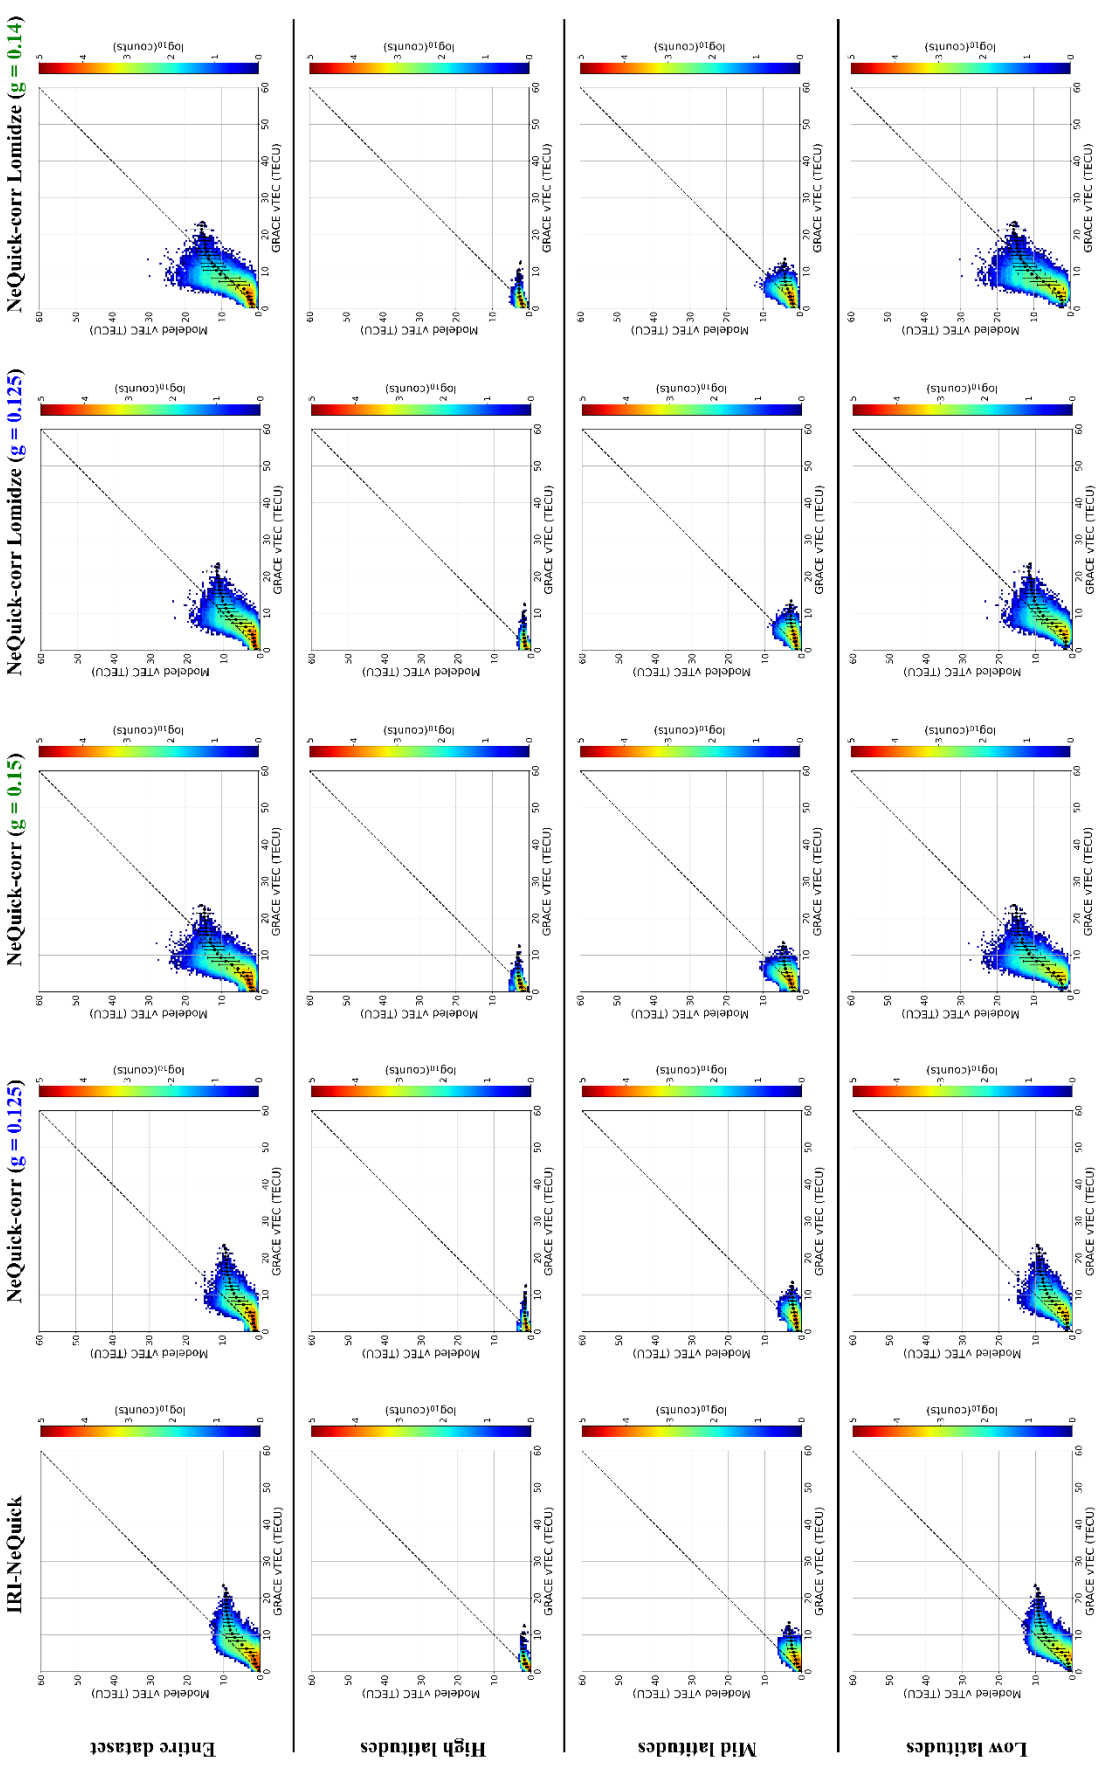

**Figure S11.** Joint probability distributions between measured vTEC values for 2008. Measured values are those from the GRACE mission. Modeled values are those from the five NeQuick topside descriptions considered in the study. The black dots refer to the mean of modeled values conditioned by GRACE observations, with the corresponding standard deviation as error bars. The NeQuick-corr options (with  $g = 0.15$  and  $0.14$ ) reduce the underestimation of VTEC compared to the options with  $g = 0.125$ .

# COSMIC-1 vTEC dataset, year 2008, joint probability distributions between measured and modeled data

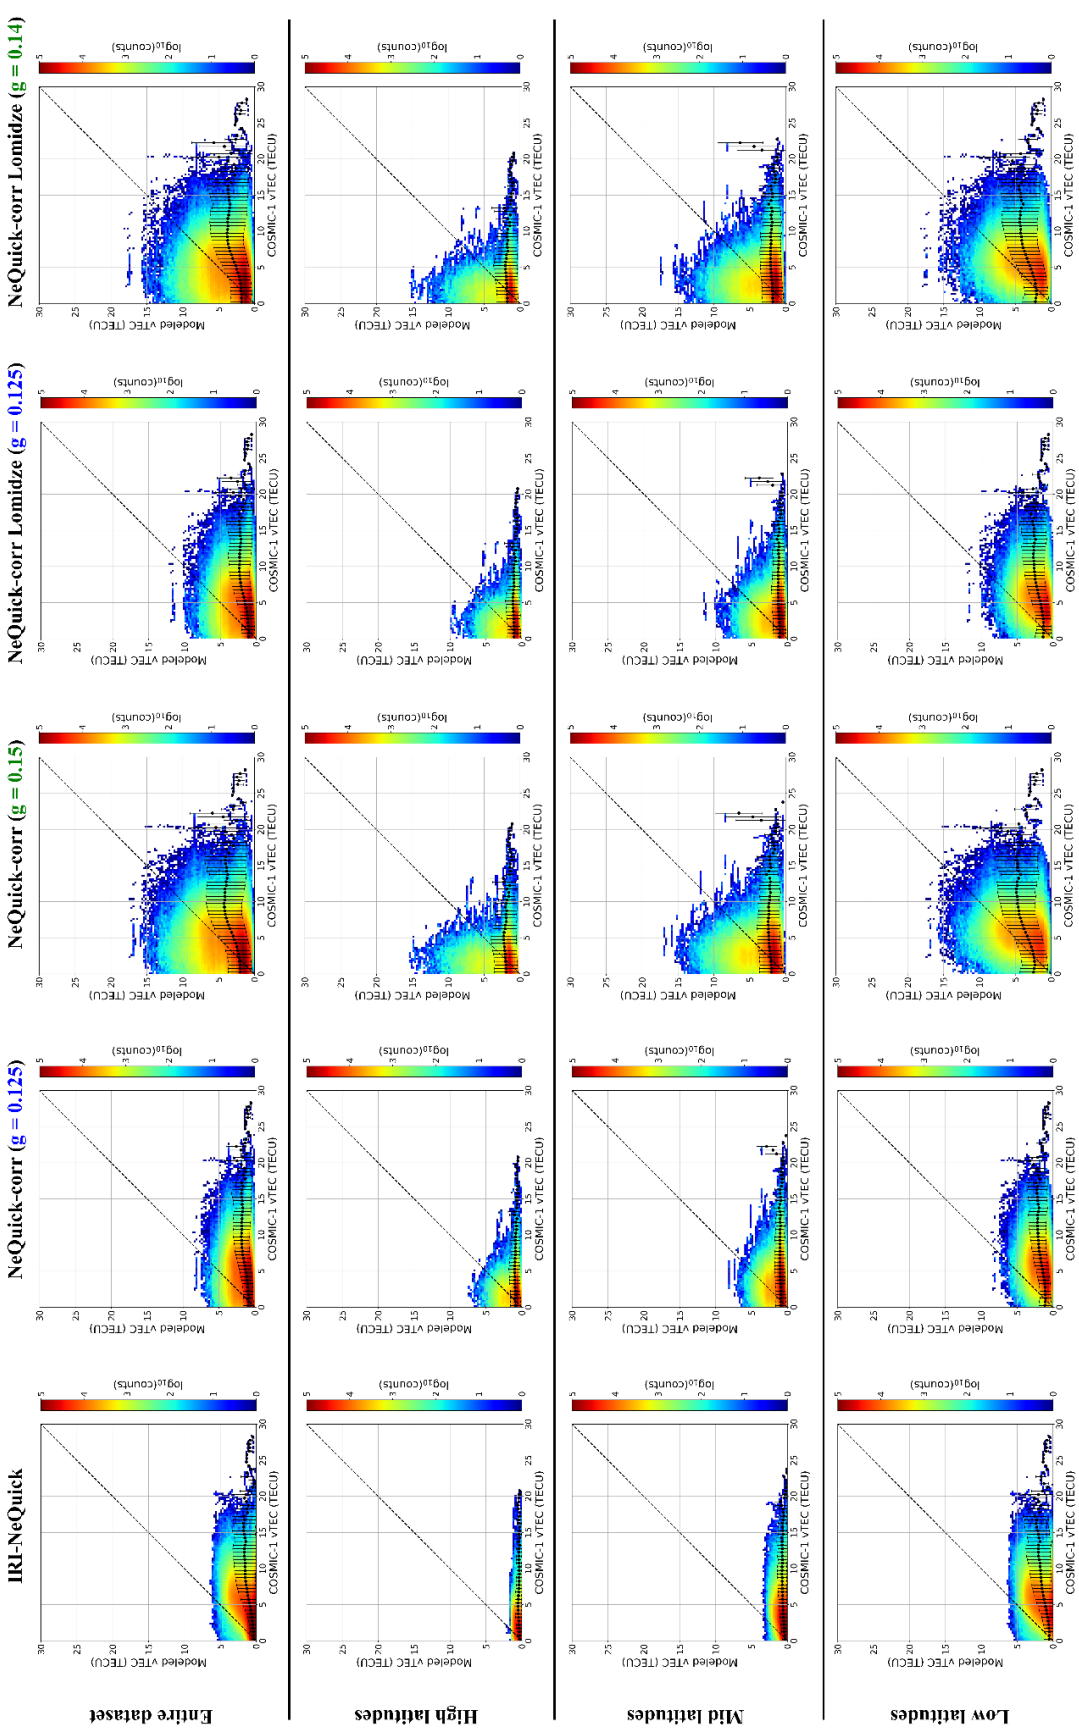

**Figure S12.** Joint probability distributions between measured and modeled vTEC values for 2008. Measured values are those from the COSMIC-1 mission. Modeled values are those from the five NeQuick topside descriptions considered in the study. The black dots refer to the mean of modeled values conditioned by COSMIC-1 observations, with the corresponding standard deviation as error bars. The NeQuick-corr options (with  $g = 0.15$  and  $0.14$ ) reduce the underestimation of VTEC compared to the options with  $g = 0.125$ .



## TerraSAR-X vTEC dataset, year 2008, histograms of residuals between measured and modeled data

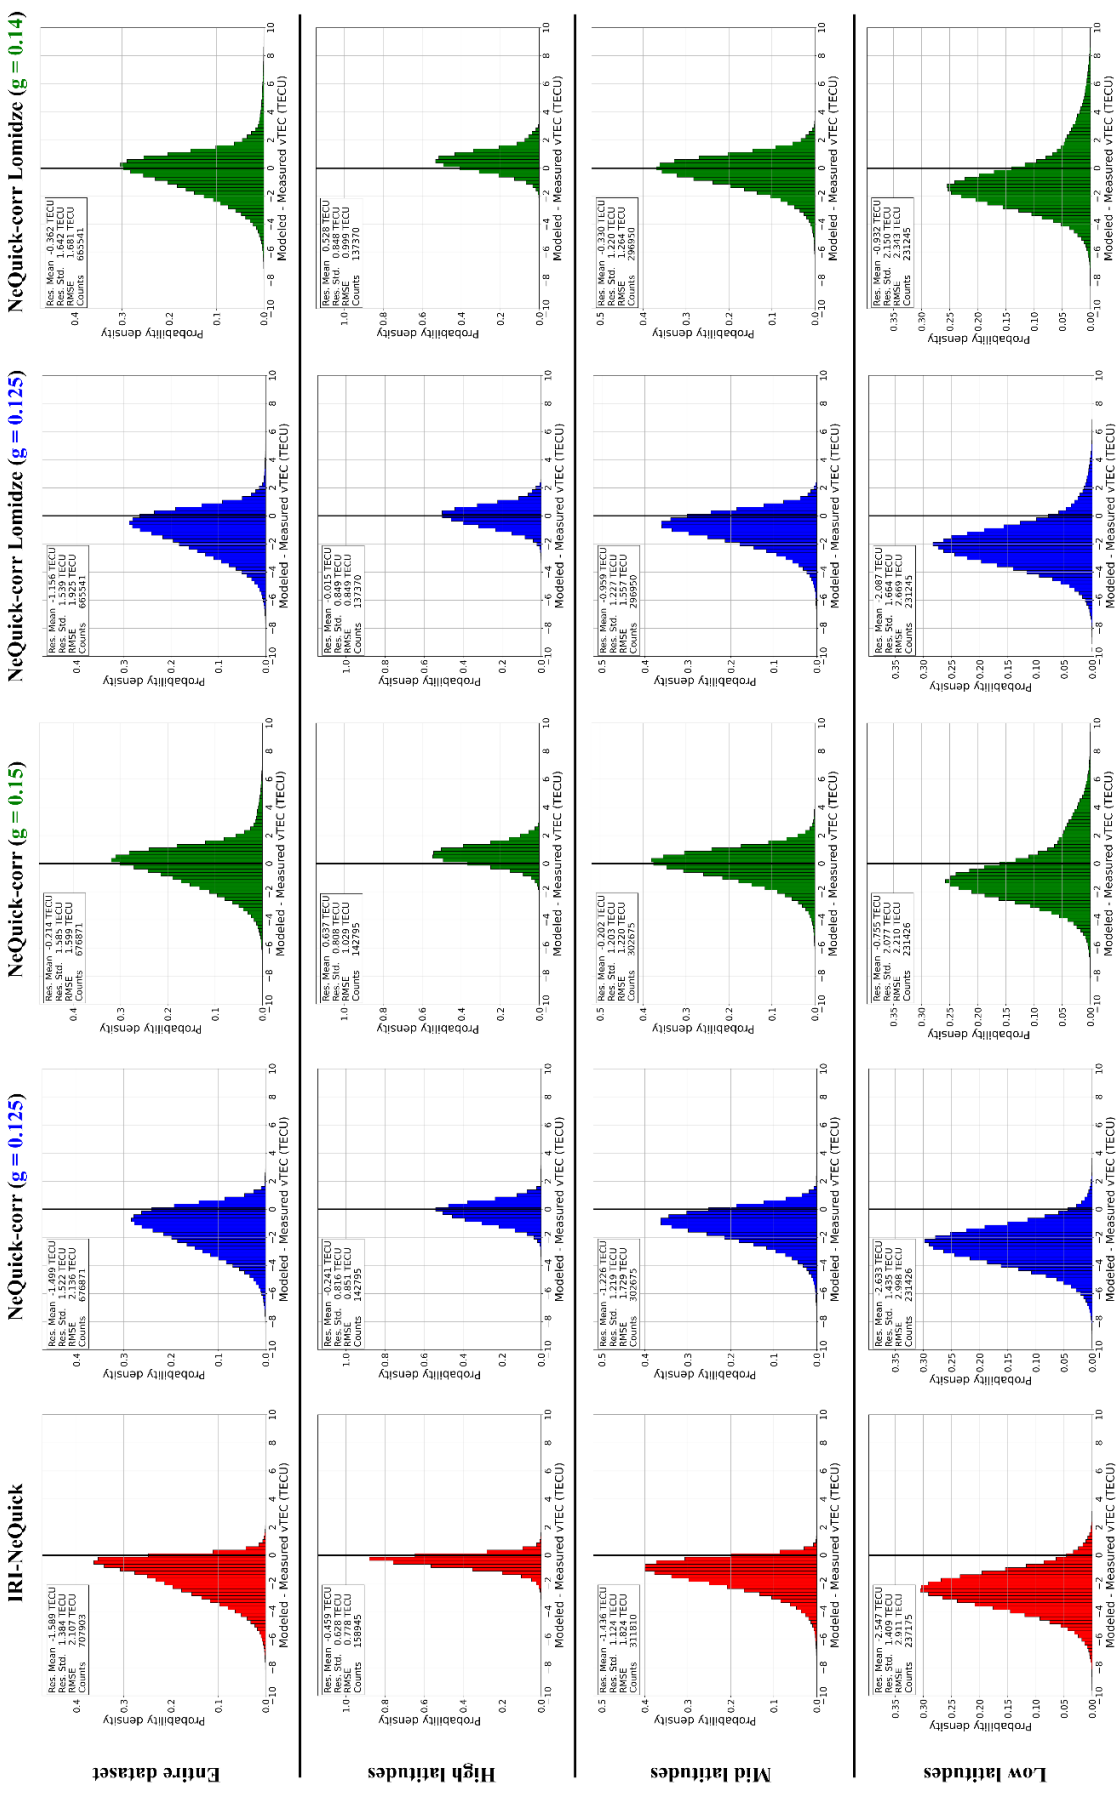

**Figure S13.** Distributions of residuals between measured and modeled vTEC values for 2008. Measured values are those from the TerraSAR-X mission. Modeled values are those from the five NeQuick topside descriptions considered in the study. In the upper left corner of each plot, the residuals mean, the residuals standard deviation, the RMSE and the counts are visible. The NeQuick-corr options (with  $g = 0.15$  and  $0.14$ ) reduce the underestimation of VTEC compared to the options with  $g = 0.125$  (green versus blue histograms).



# METOP vTEC dataset, year 2008, histograms of residuals between measured and modeled data

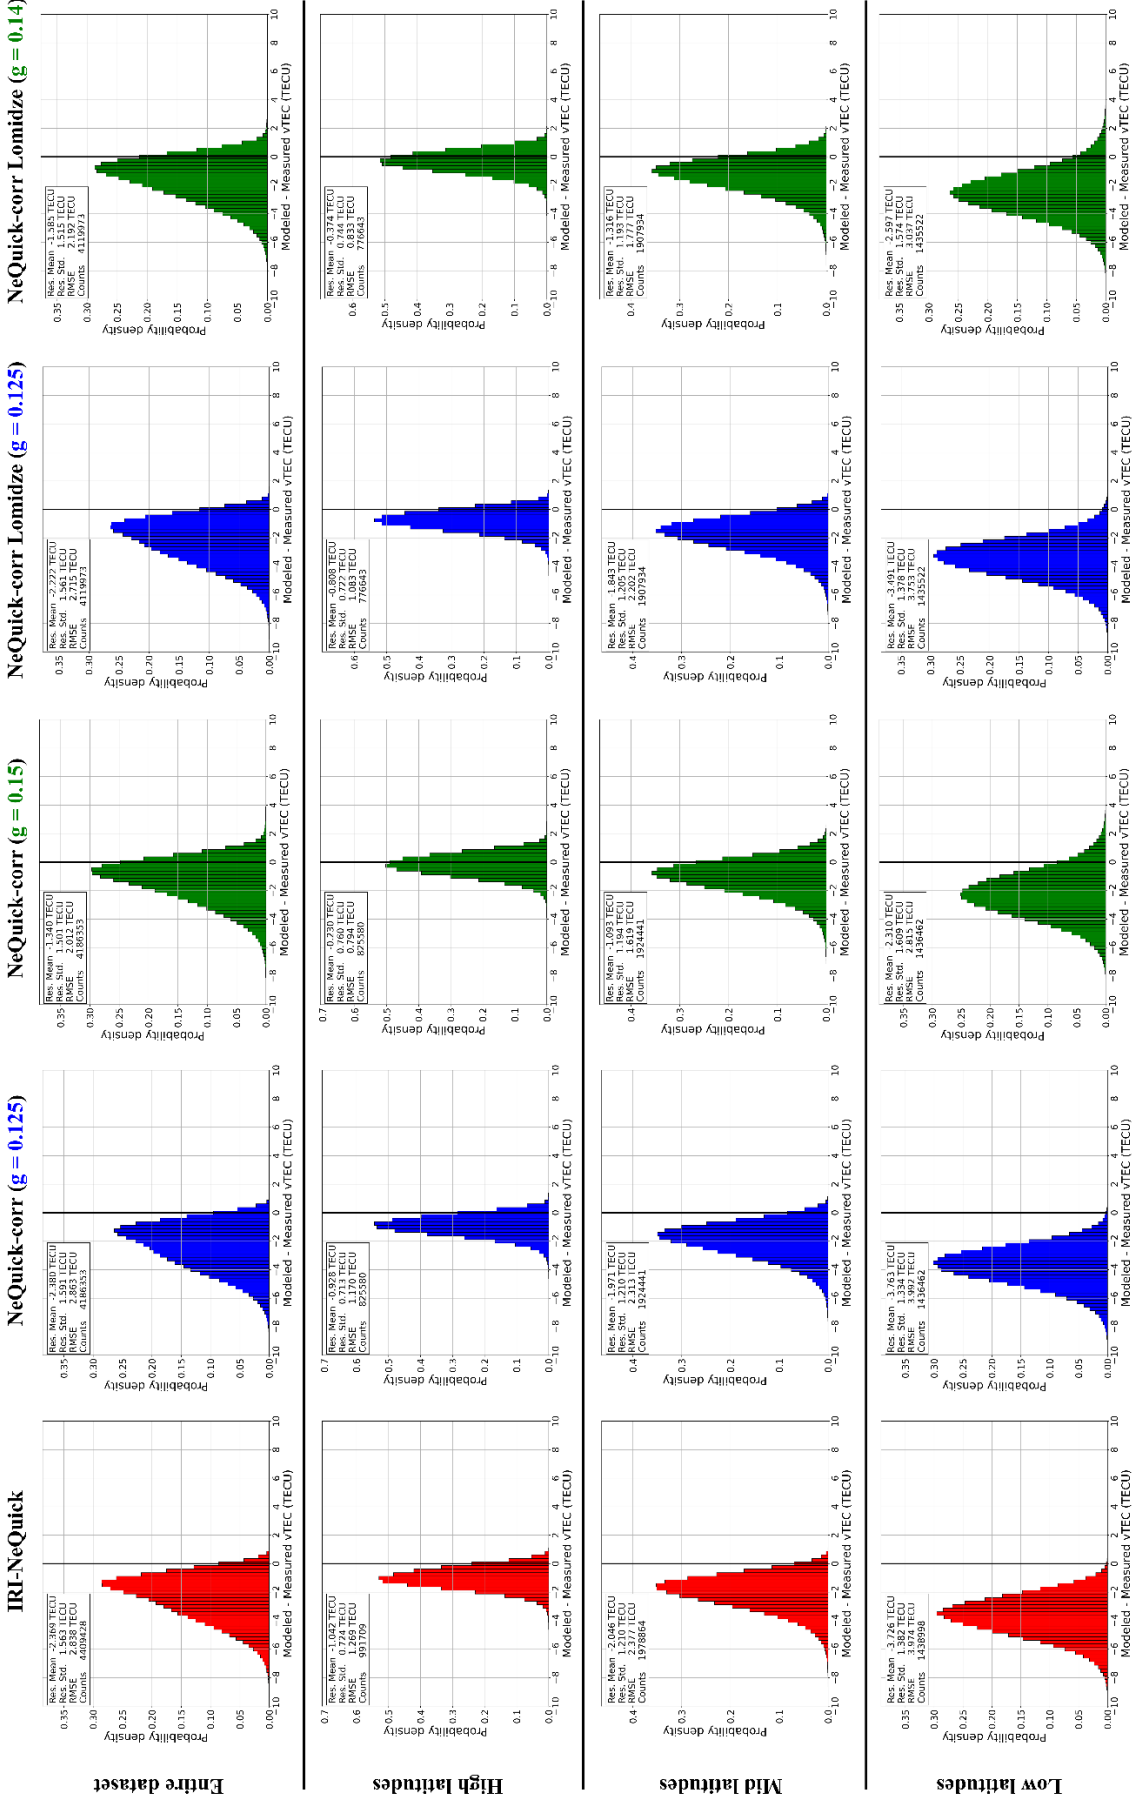

**Figure S14.** Distributions of residuals between measured and modeled vTEC values for 2008. Measured values are those from the METOP mission. Modeled values are those from the five NeQuick topside descriptions considered in the study. In the upper left corner of each plot, the residuals mean, the residuals standard deviation, the RMSE and the counts are visible. The NeQuick-corr options (with  $g = 0.15$  and  $0.14$ ) reduce the underestimation of VTEC compared to the options with  $g = 0.125$  (green versus blue histograms).

## GRACE vTEC dataset, year 2008, histograms of residuals between measured and modeled data

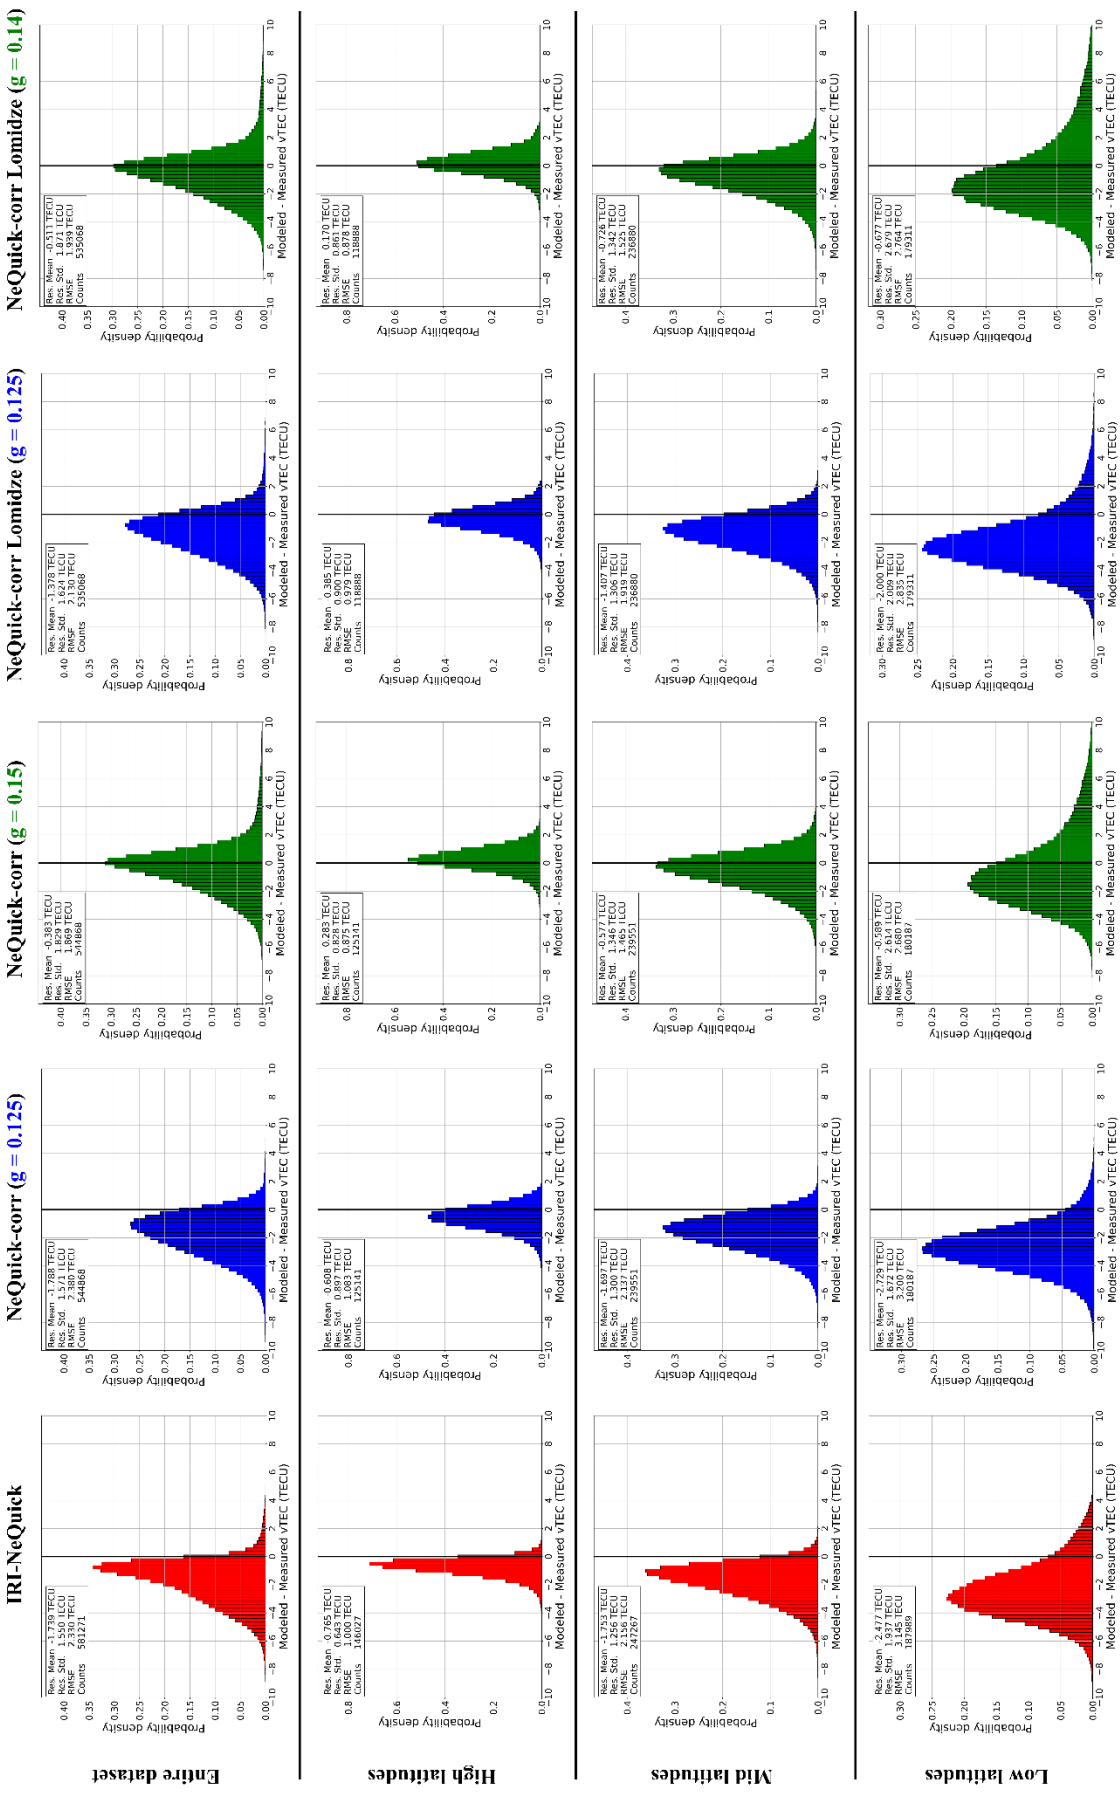

**Figure S15.** Distributions of residuals between measured and modeled vTEC values for 2008. Measured values are those from the GRACE mission. Modeled values are those from the five NeQuick topside descriptions considered in the study. In the upper left corner of each plot, the residuals mean, the residuals standard deviation, the RMSE and the counts are visible. The NeQuick-corr options (with  $g = 0.15$  and  $0.14$ ) reduce the underestimation of VTEC compared to the options with  $g = 0.125$  (green versus blue histograms).

## COSMIC-1 vTEC dataset, year 2008, histograms of residuals between measured and modeled data

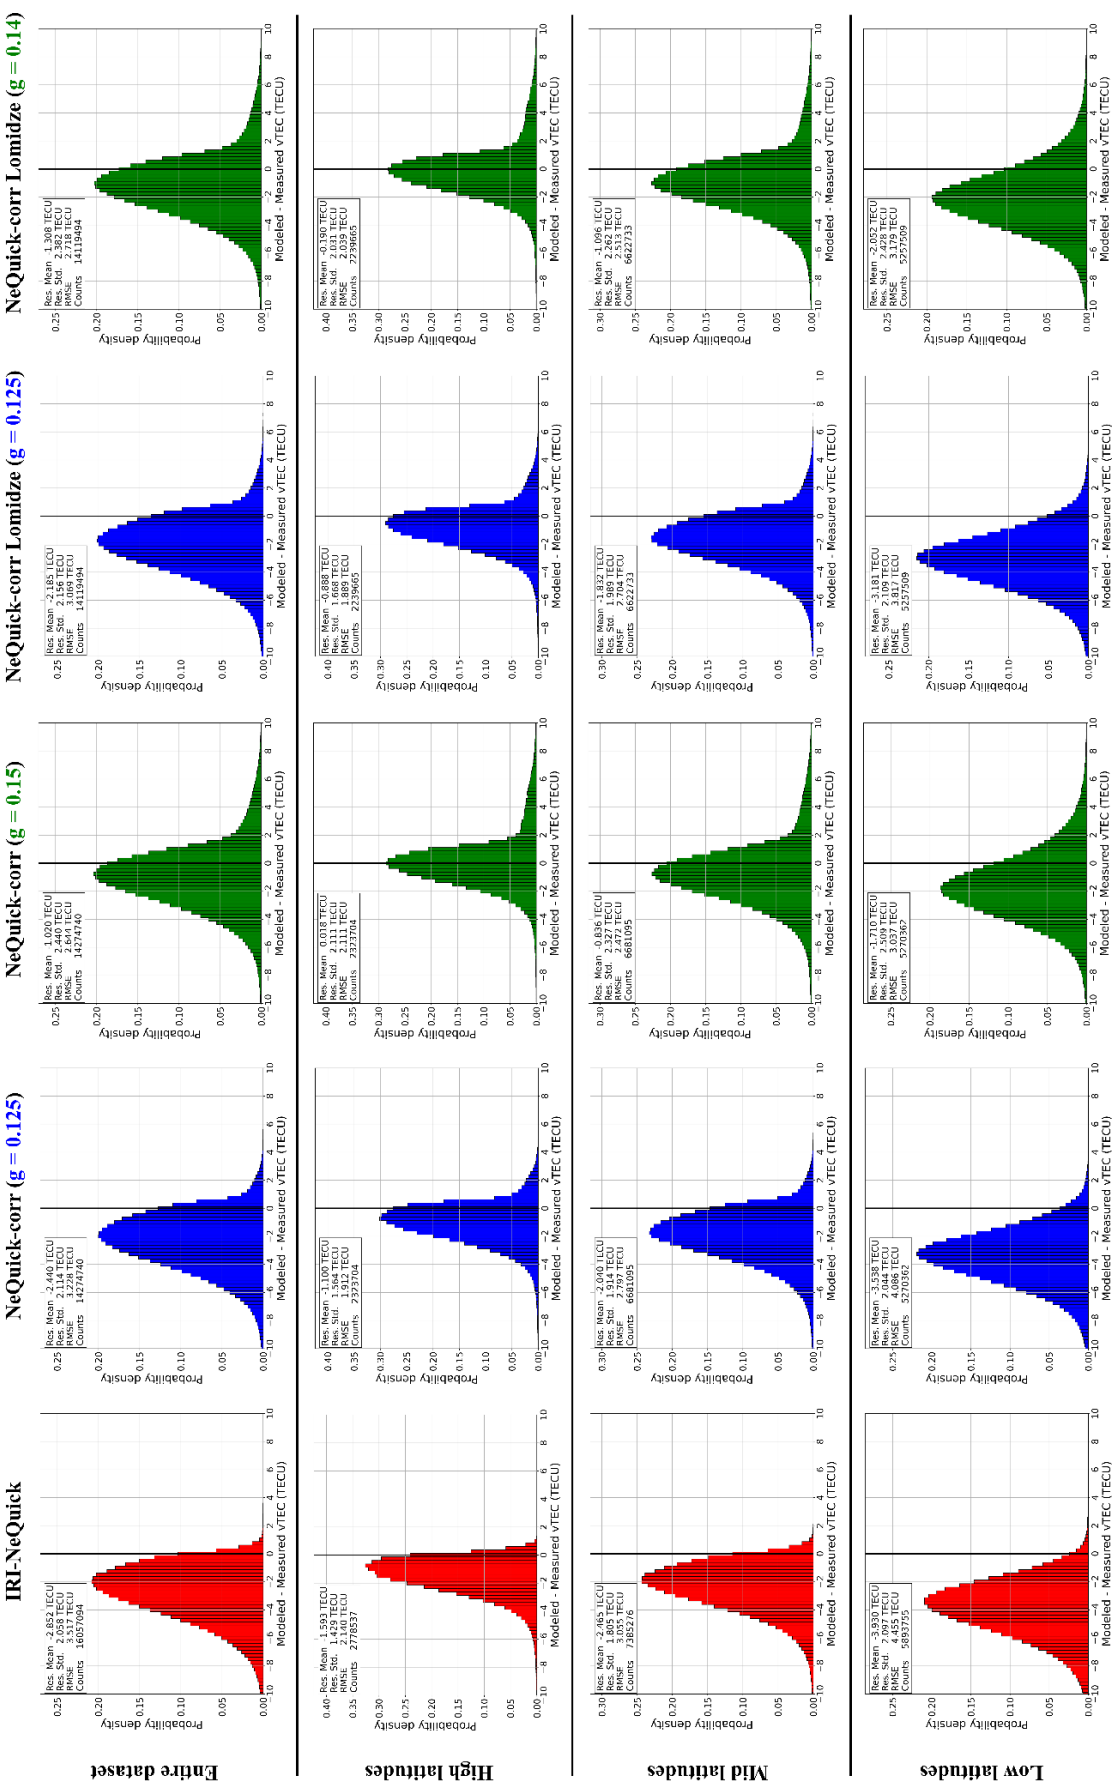

**Figure S16.** Distributions of residuals between measured and modeled vTEC values for 2008. Measured values are those from the COSMIC-1 mission. Modeled values are those from the five NeQuick topside descriptions considered in the study. In the upper left corner of each plot, the residuals mean, the residuals standard deviation, the RMSE and the counts are visible. The NeQuick-corr options (with  $g = 0.15$  and  $0.14$ ) reduce the underestimation of VTEC compared to the options with  $g = 0.125$  (green versus blue histograms).

## TerraSAR-X vTEC dataset, year 2011, joint probability distributions between measured and modeled data

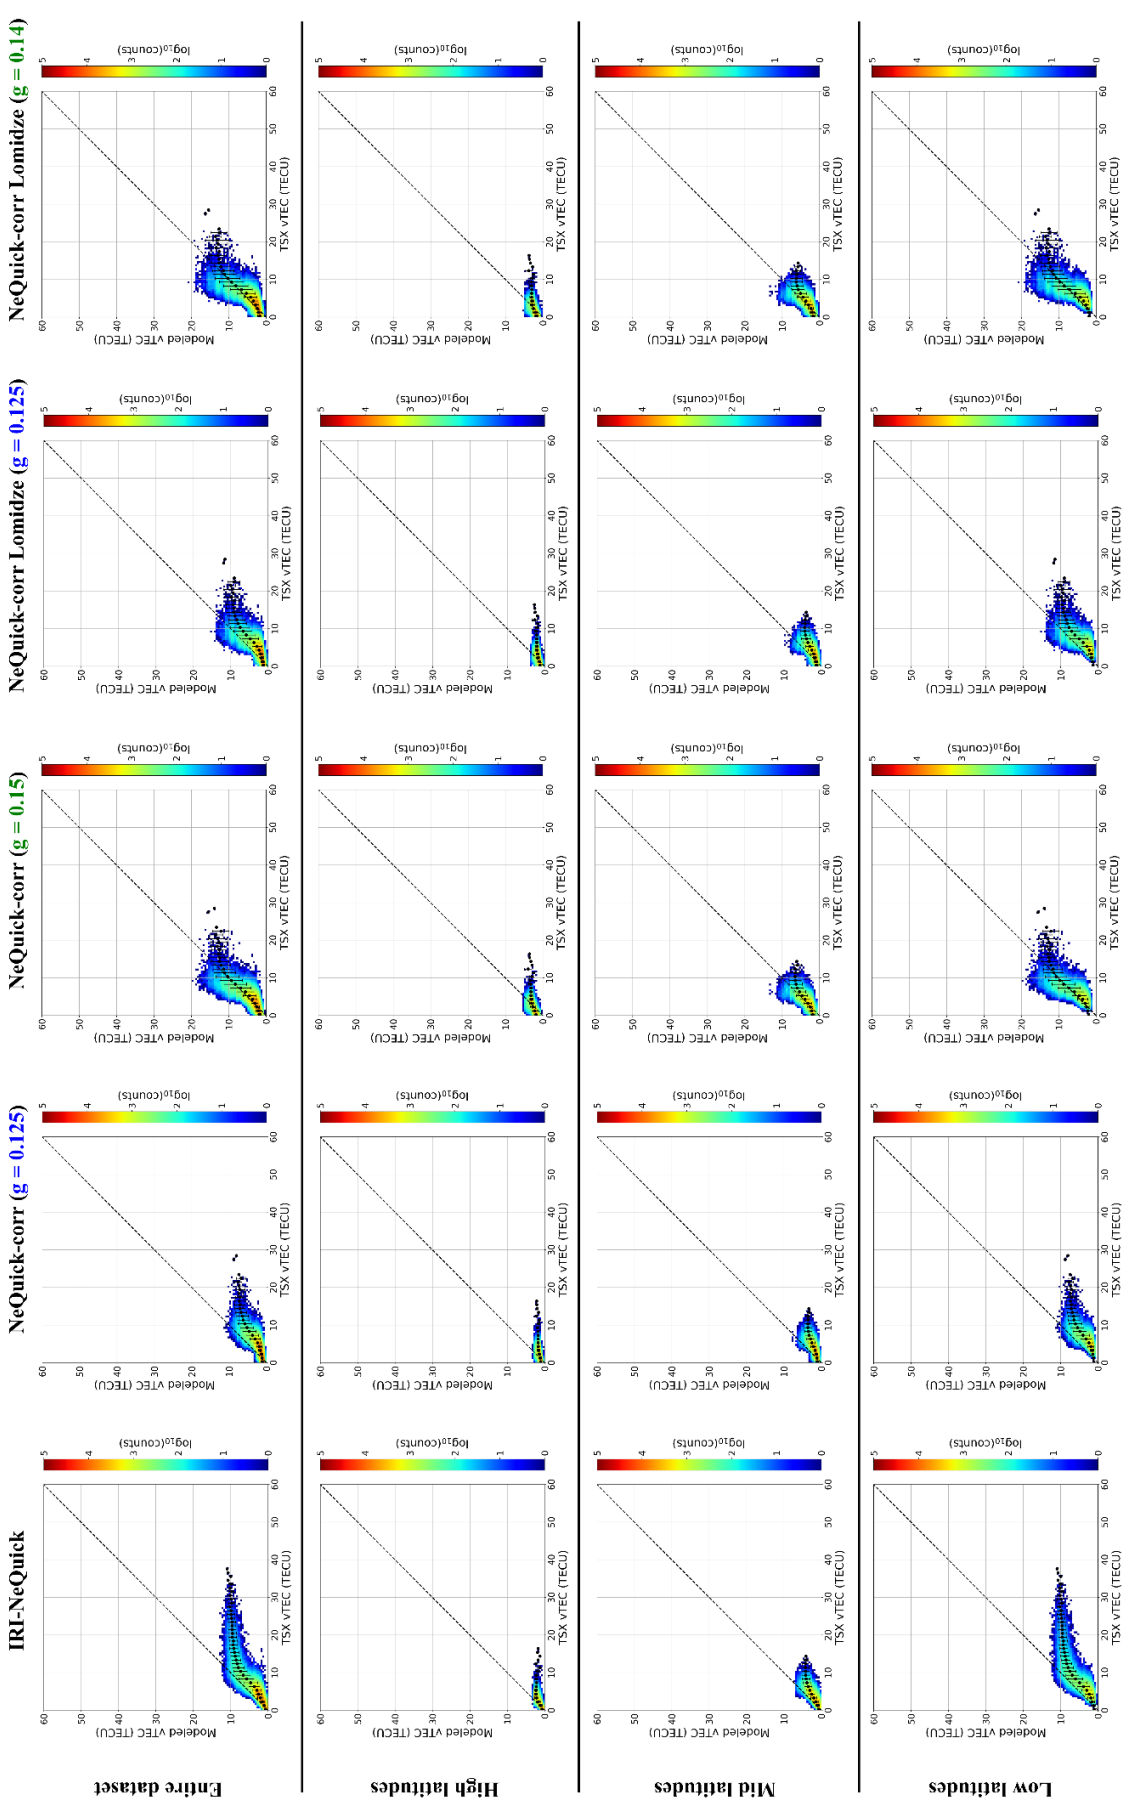

**Figure S17.** Joint probability distributions between measured and modeled vTEC values for 2011. Measured values are those from the TerraSAR-X mission. Modeled values are those from the five NeQuick topside descriptions considered in the study. The black dots refer to the mean of modeled values conditioned by TerraSAR-X observations, with the corresponding standard deviation as error bars. The NeQuick-corr options (with  $g = 0.15$  and  $0.14$ ) reduce the underestimation of VTEC compared to the options with  $g = 0.125$ .

**METOP vTEC dataset, year 2011, joint probability distributions between measured and modeled data**

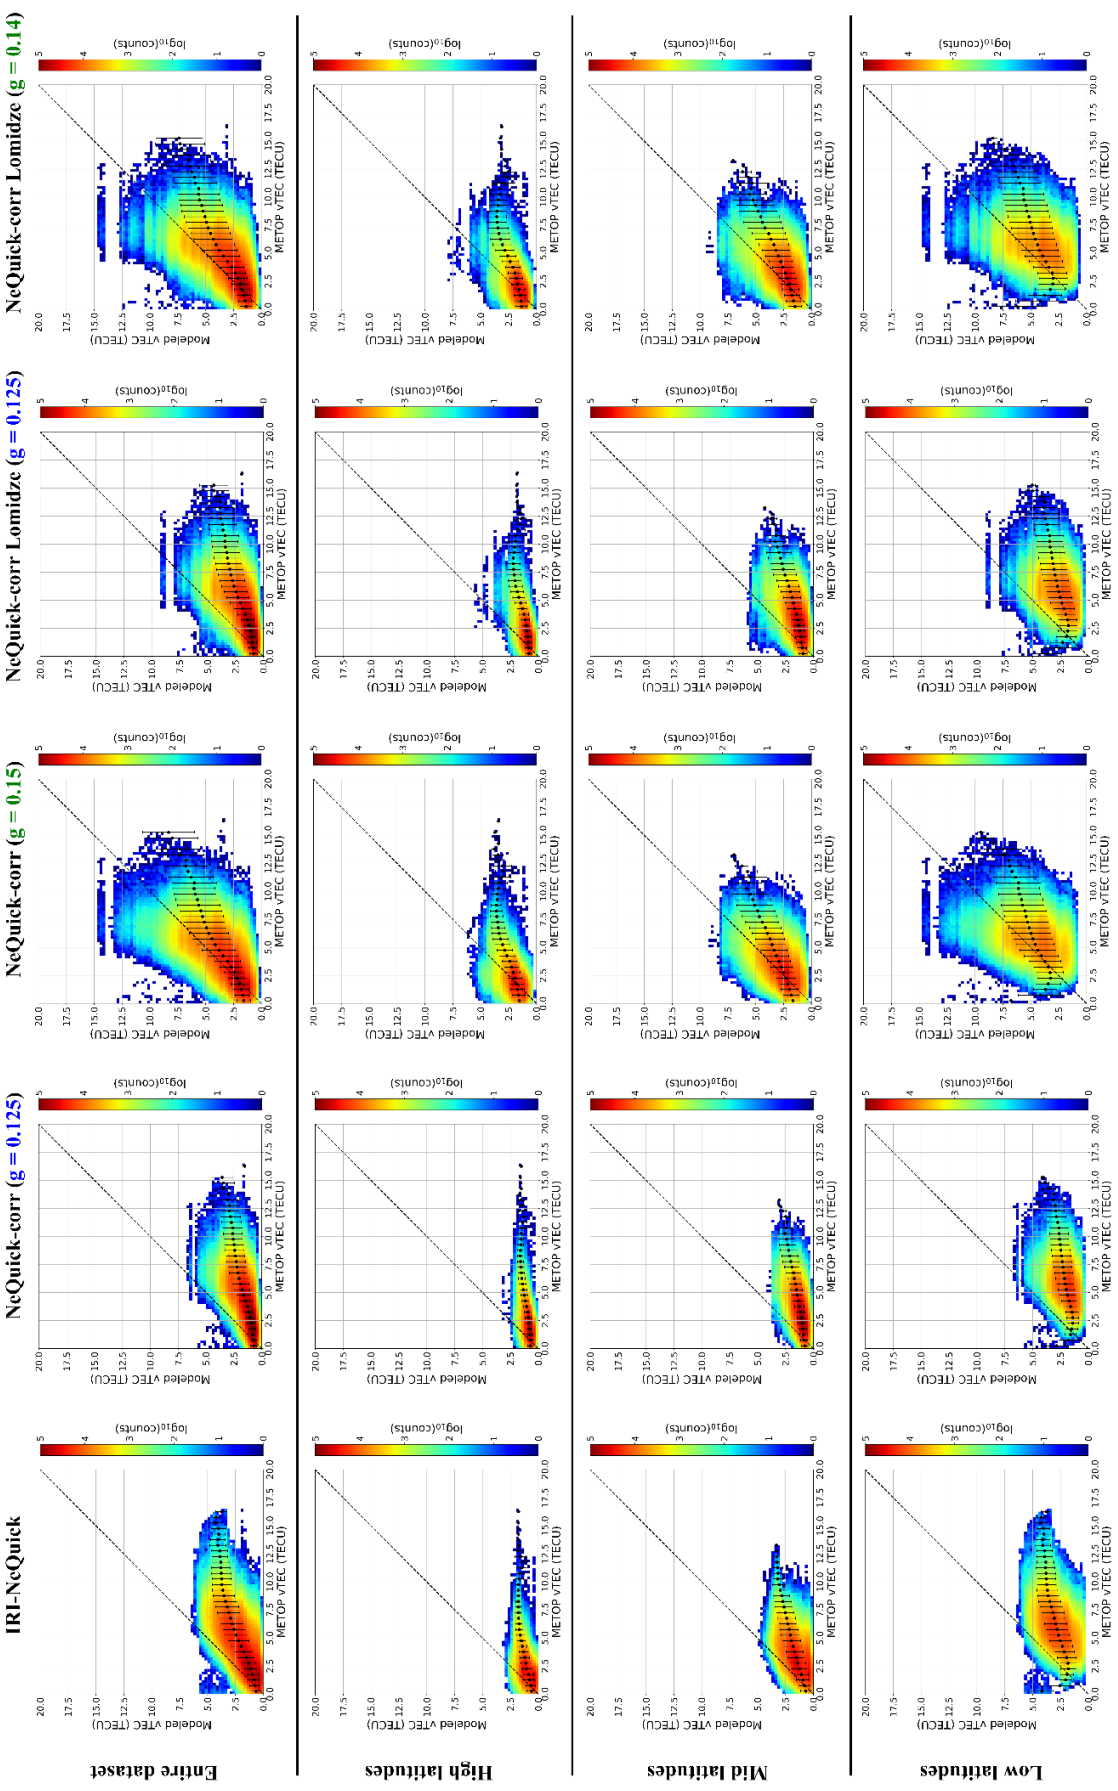

**Figure S18.** Joint probability distributions between measured and modeled vTEC values for 2011. Measured values are those from the METOP mission. Modeled values are those from the five NeQuick topside descriptions considered in the study. The black dots refer to the mean of modeled values conditioned by METOP observations, with the corresponding standard deviation as error bars. The NeQuick-corr options (with  $g = 0.15$  and  $0.14$ ) reduce the underestimation of VTEC compared to the options with  $g = 0.125$ .



## GRACE vTEC dataset, year 2011, joint probability distributions between measured and modeled data

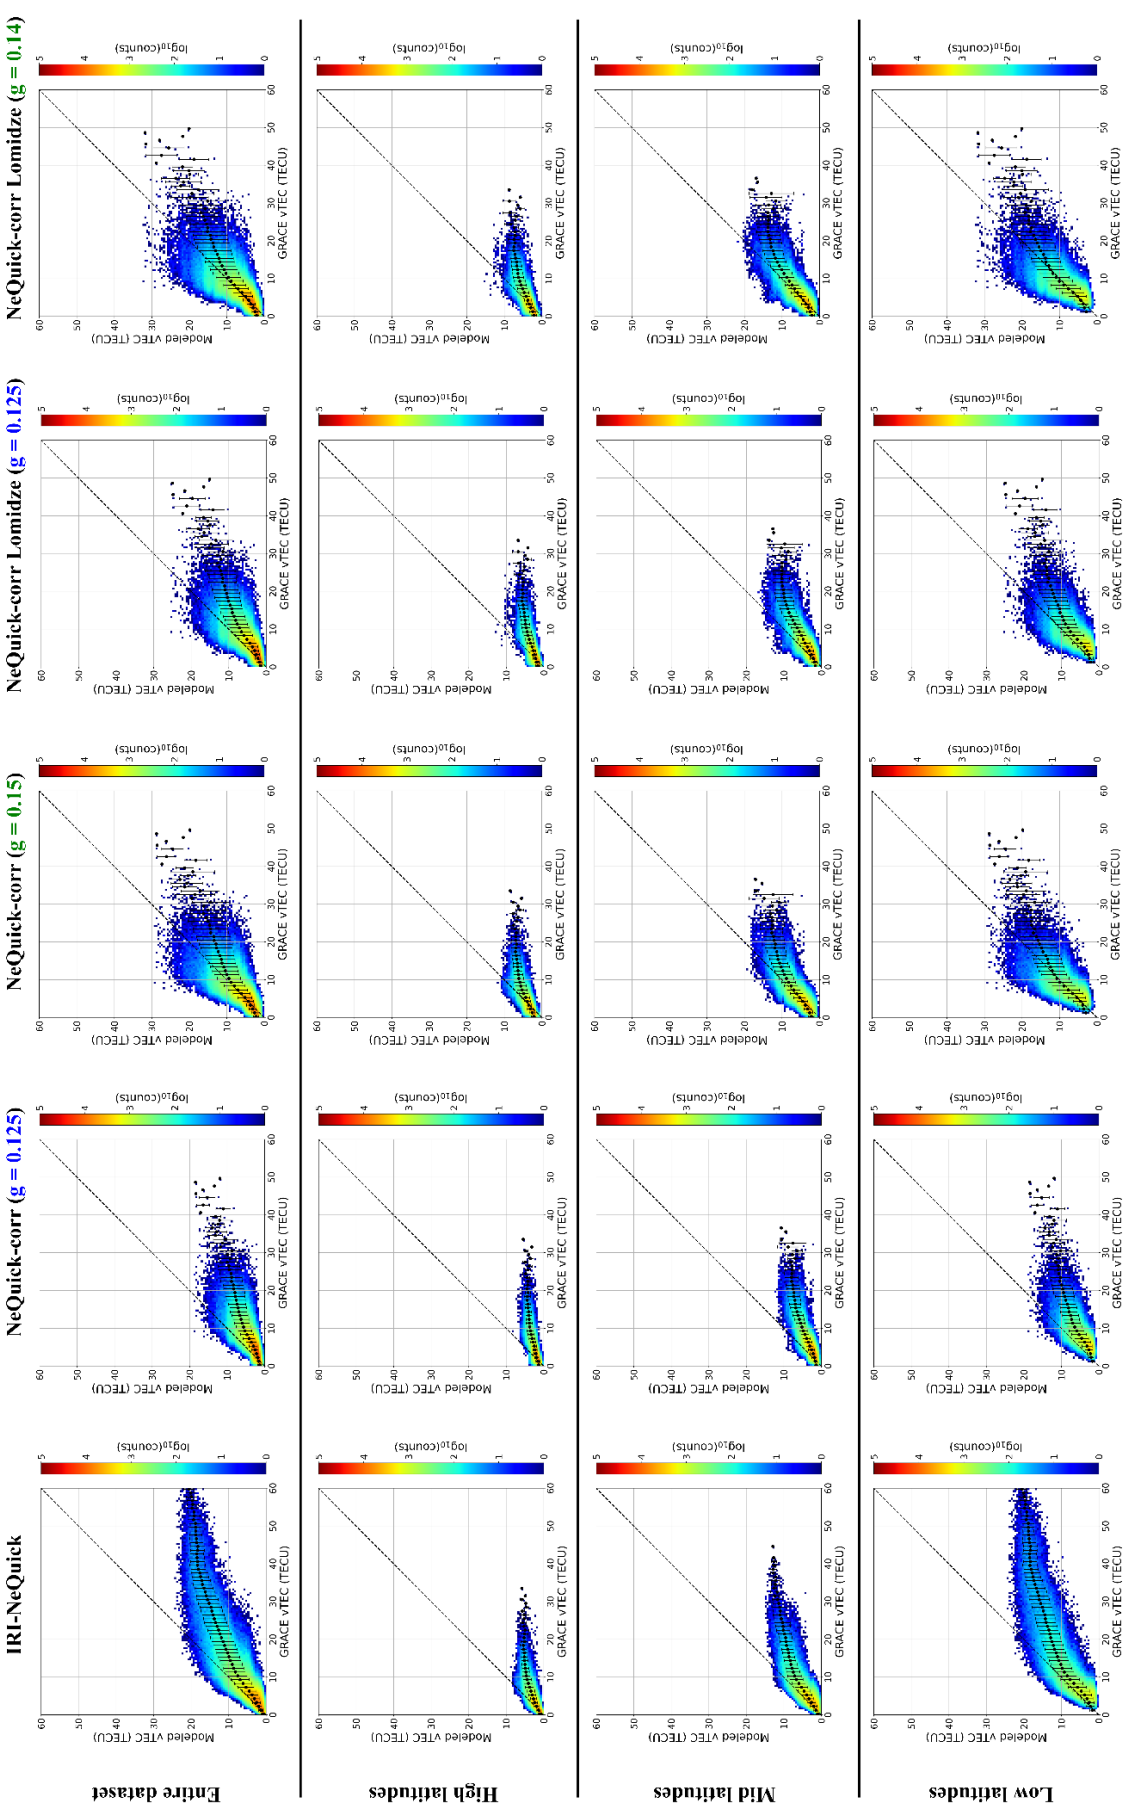

**Figure S19.** Joint probability distributions between measured and modeled vTEC values for 2011. Measured values are those from the GRACE mission. Modeled values are those from the five NeQuick topside descriptions considered in the study. The black dots refer to the mean of modeled values conditioned by GRACE observations, with the corresponding standard deviation as error bars. The NeQuick-corr options (with  $g = 0.15$  and  $0.14$ ) reduce the underestimation of VTEC compared to the options with  $g = 0.125$ .



## COSMIC-1 vTEC dataset, year 2011, joint probability distributions between measured and modeled data

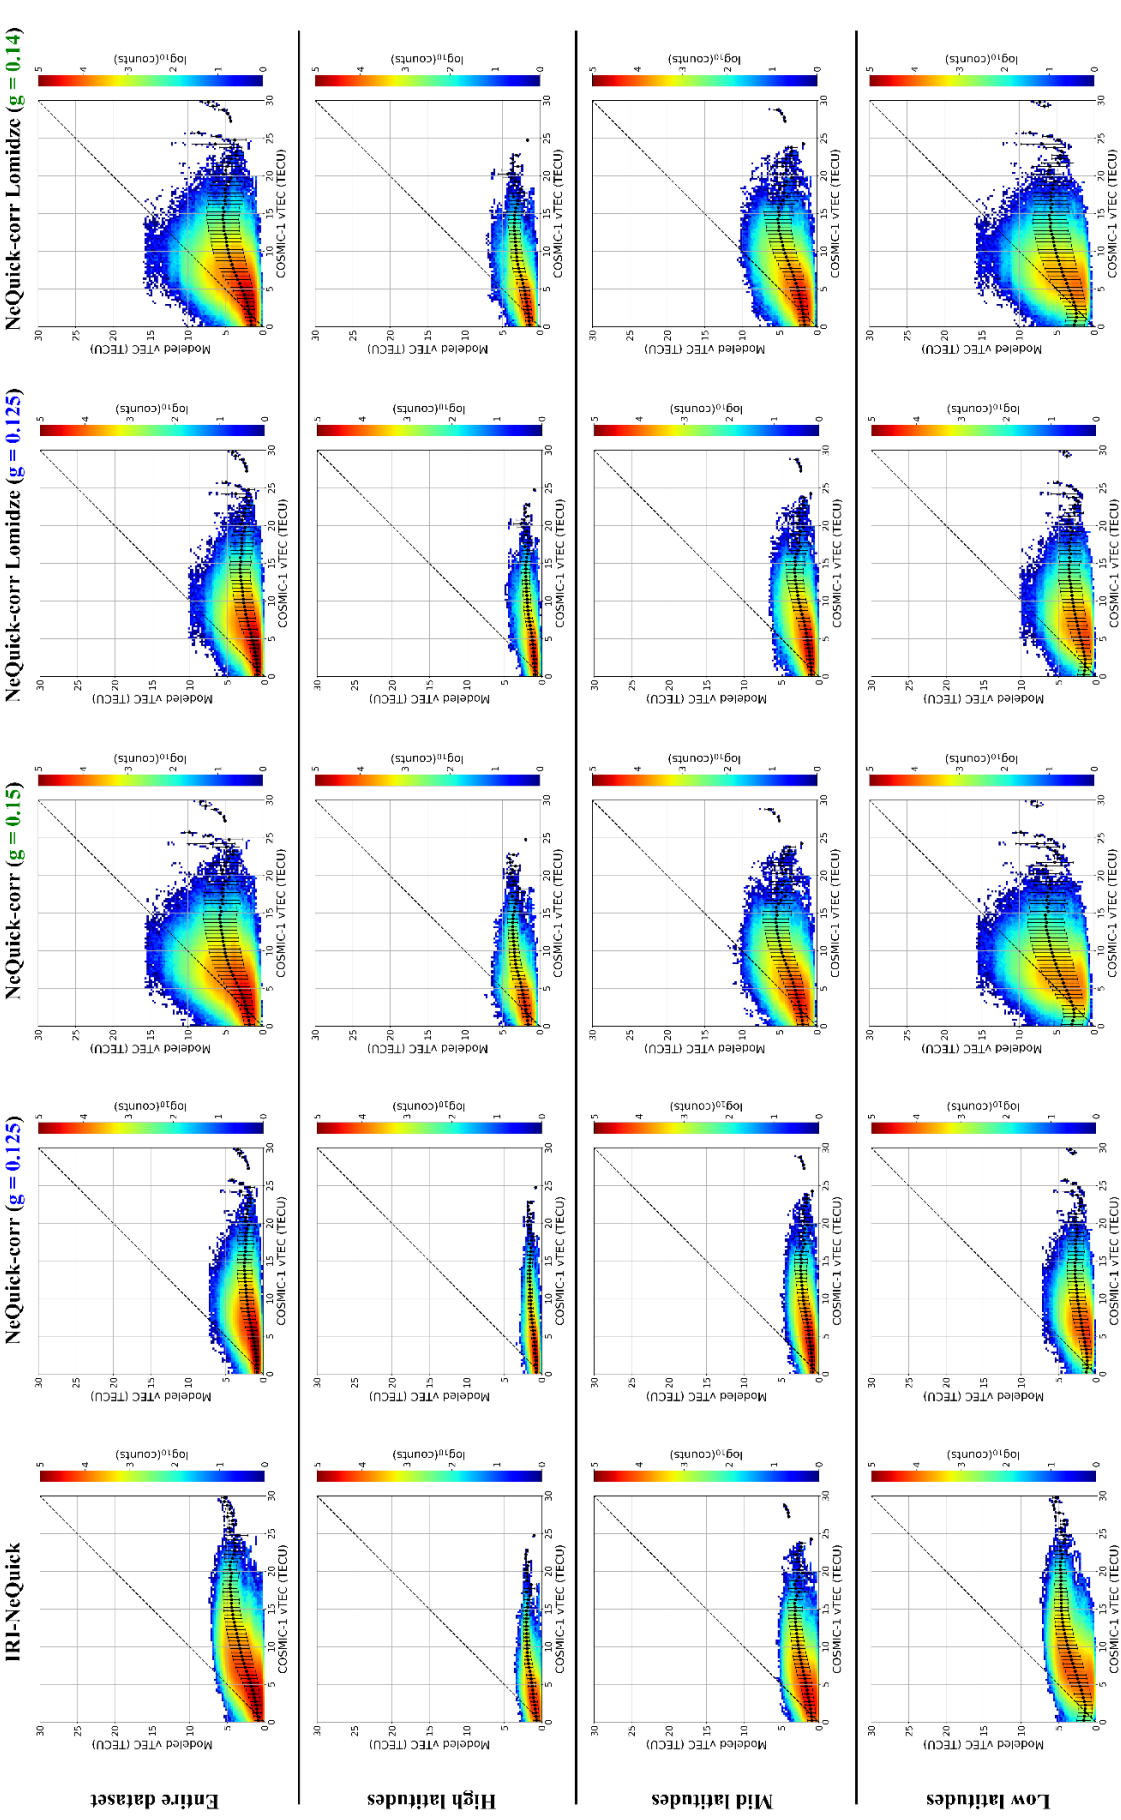

**Figure S20.** Joint probability distributions between measured and modeled vTEC values for 2011. Measured values are those from the COSMIC-1 mission. Modeled values are those from the five NeQuick topside descriptions considered in the study. The black dots refer to the mean of modeled values conditioned by COSMIC-1 observations, with the corresponding standard deviation as error bars. The NeQuick-corr options (with  $g = 0.15$  and  $0.14$ ) reduce the underestimation of VTEC compared to the options with  $g = 0.125$ .

## TerraSAR-X vTEC dataset, year 2011, histograms of residuals between measured and modeled data

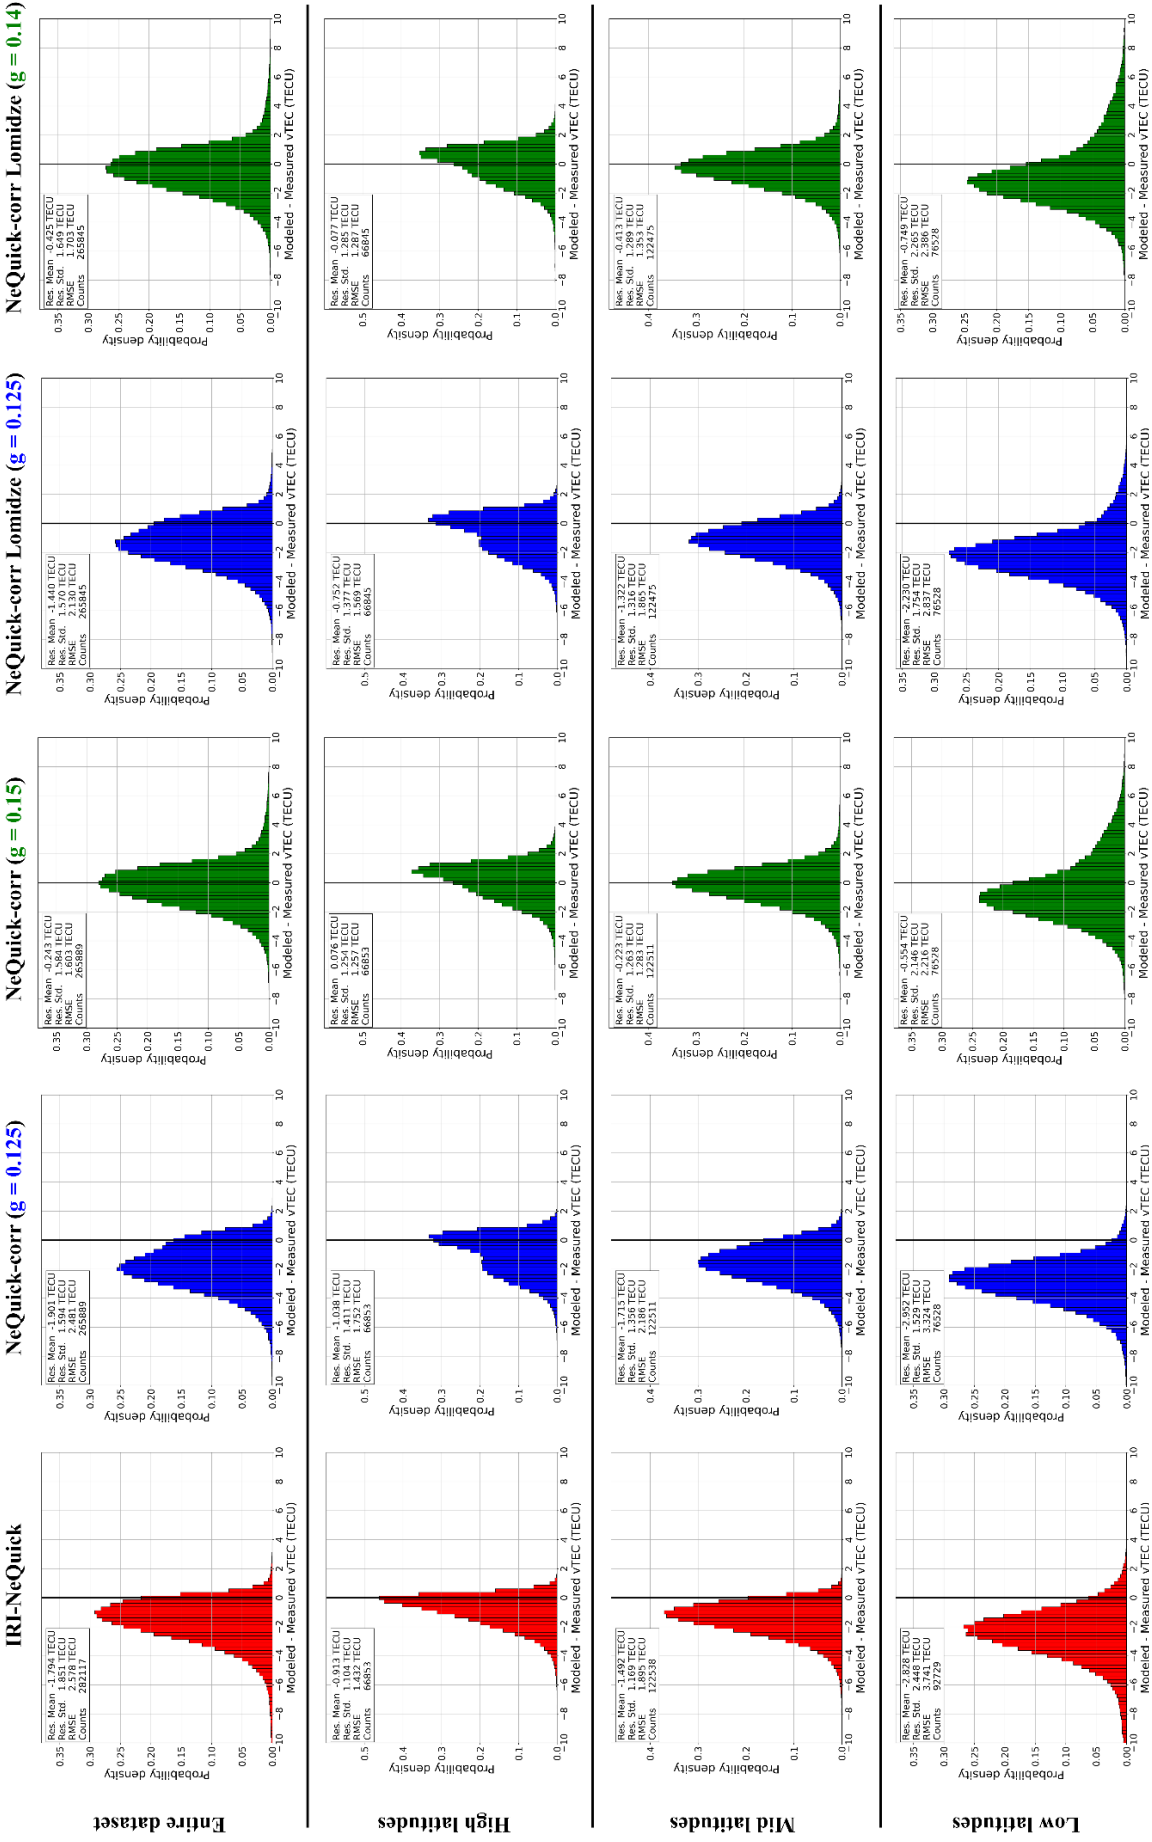

**Figure S21.** Distributions of residuals between measured and modeled vTEC values for 2011. Measured values are those from the TerraSAR-X mission. Modeled values are those from the five NeQuick topside descriptions considered in the study. In the upper left corner of each plot, the residuals mean, the residuals standard deviation, the RMSE and the counts are visible. The NeQuick-corr options (with  $g = 0.15$  and  $0.14$ ) reduce the underestimation of VTEC compared to the options with  $g = 0.125$  (green versus blue histograms).

## METOP vTEC dataset, year 2011, histograms of residuals between measured and modeled data

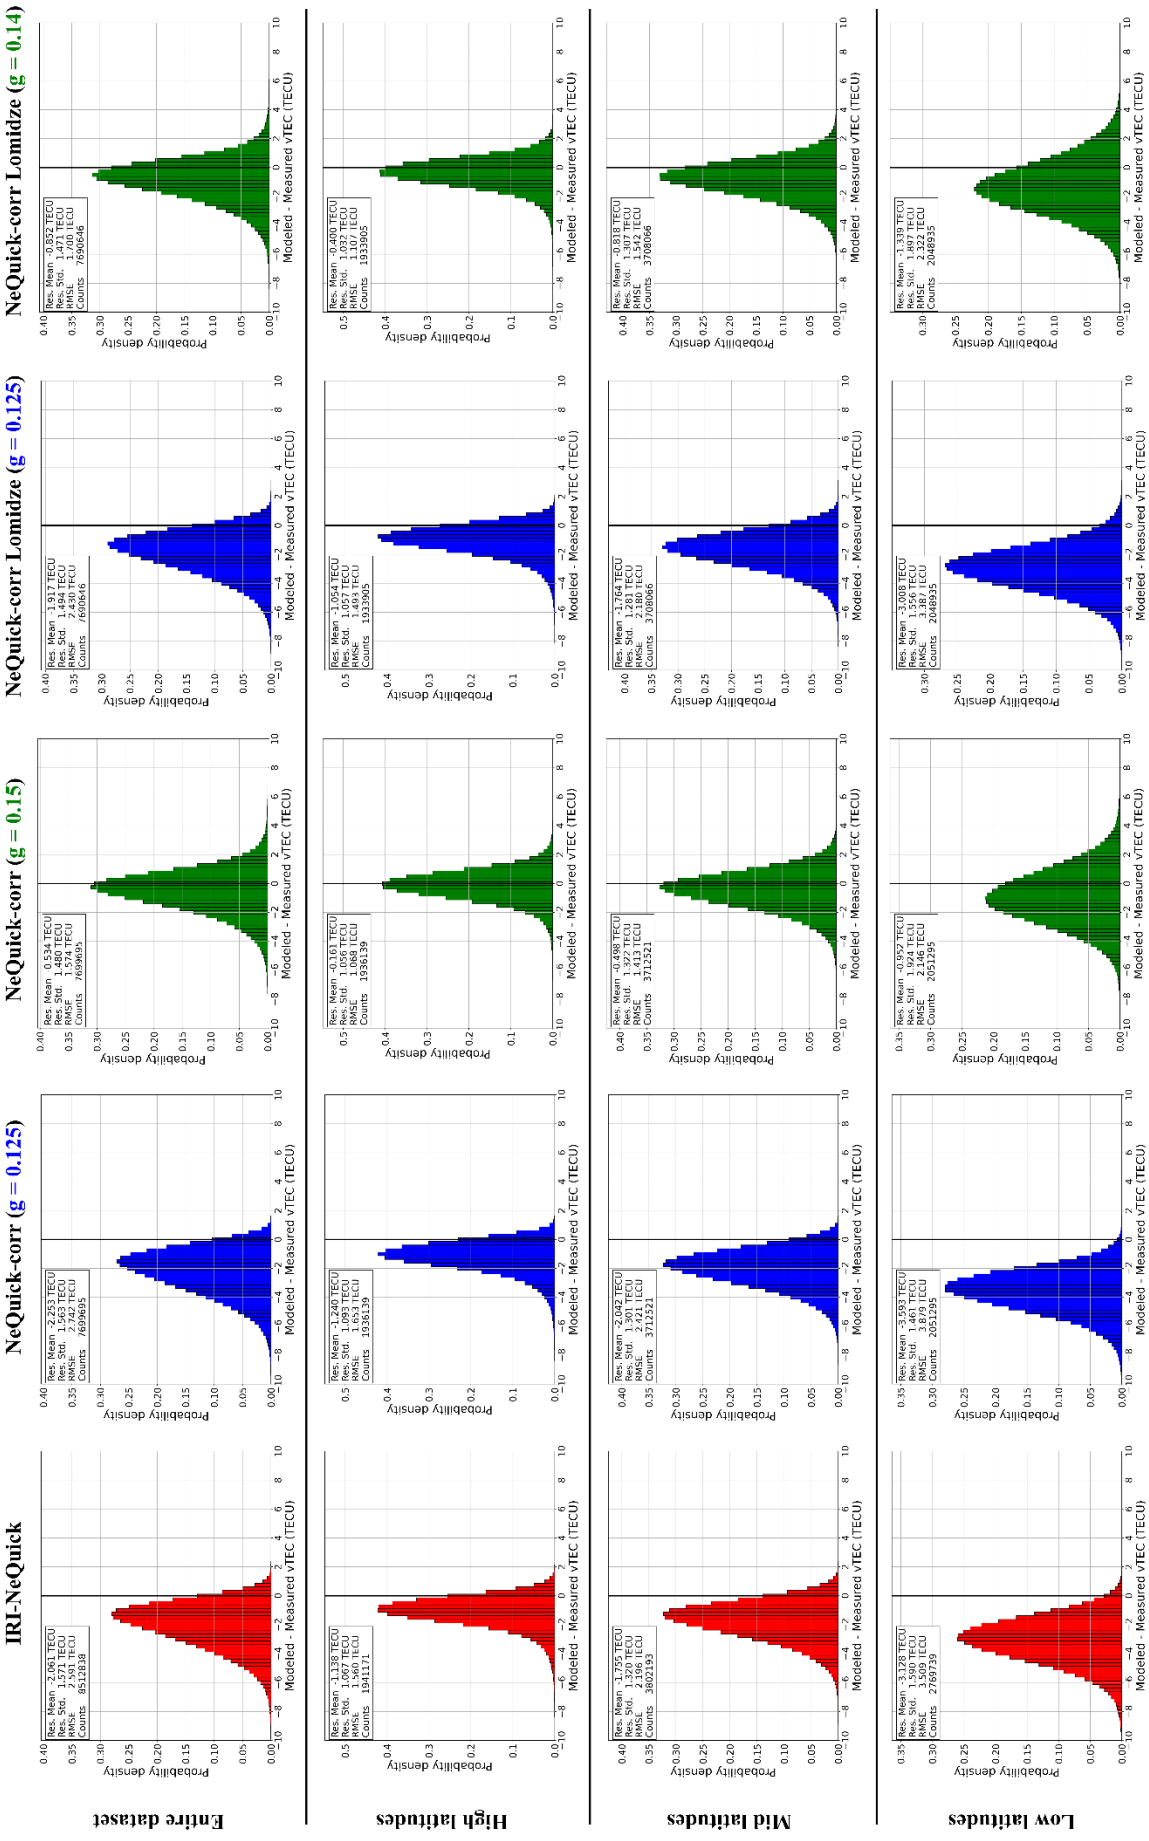

**Figure S22.** Distributions of residuals between measured and modeled vTEC values for 2011. Measured values are those from the METOP mission. Modeled values are those from the five NeQuick topside descriptions considered in the study. In the upper left corner of each plot, the residuals mean, the residuals standard deviation, the RMSE and the counts are visible. The NeQuick-corr options (with  $g = 0.15$  and  $0.14$ ) reduce the underestimation of VTEC compared to the options with  $g = 0.125$  (green versus blue histograms).

## GRACE vTEC dataset, year 2011, histograms of residuals between measured and modeled data

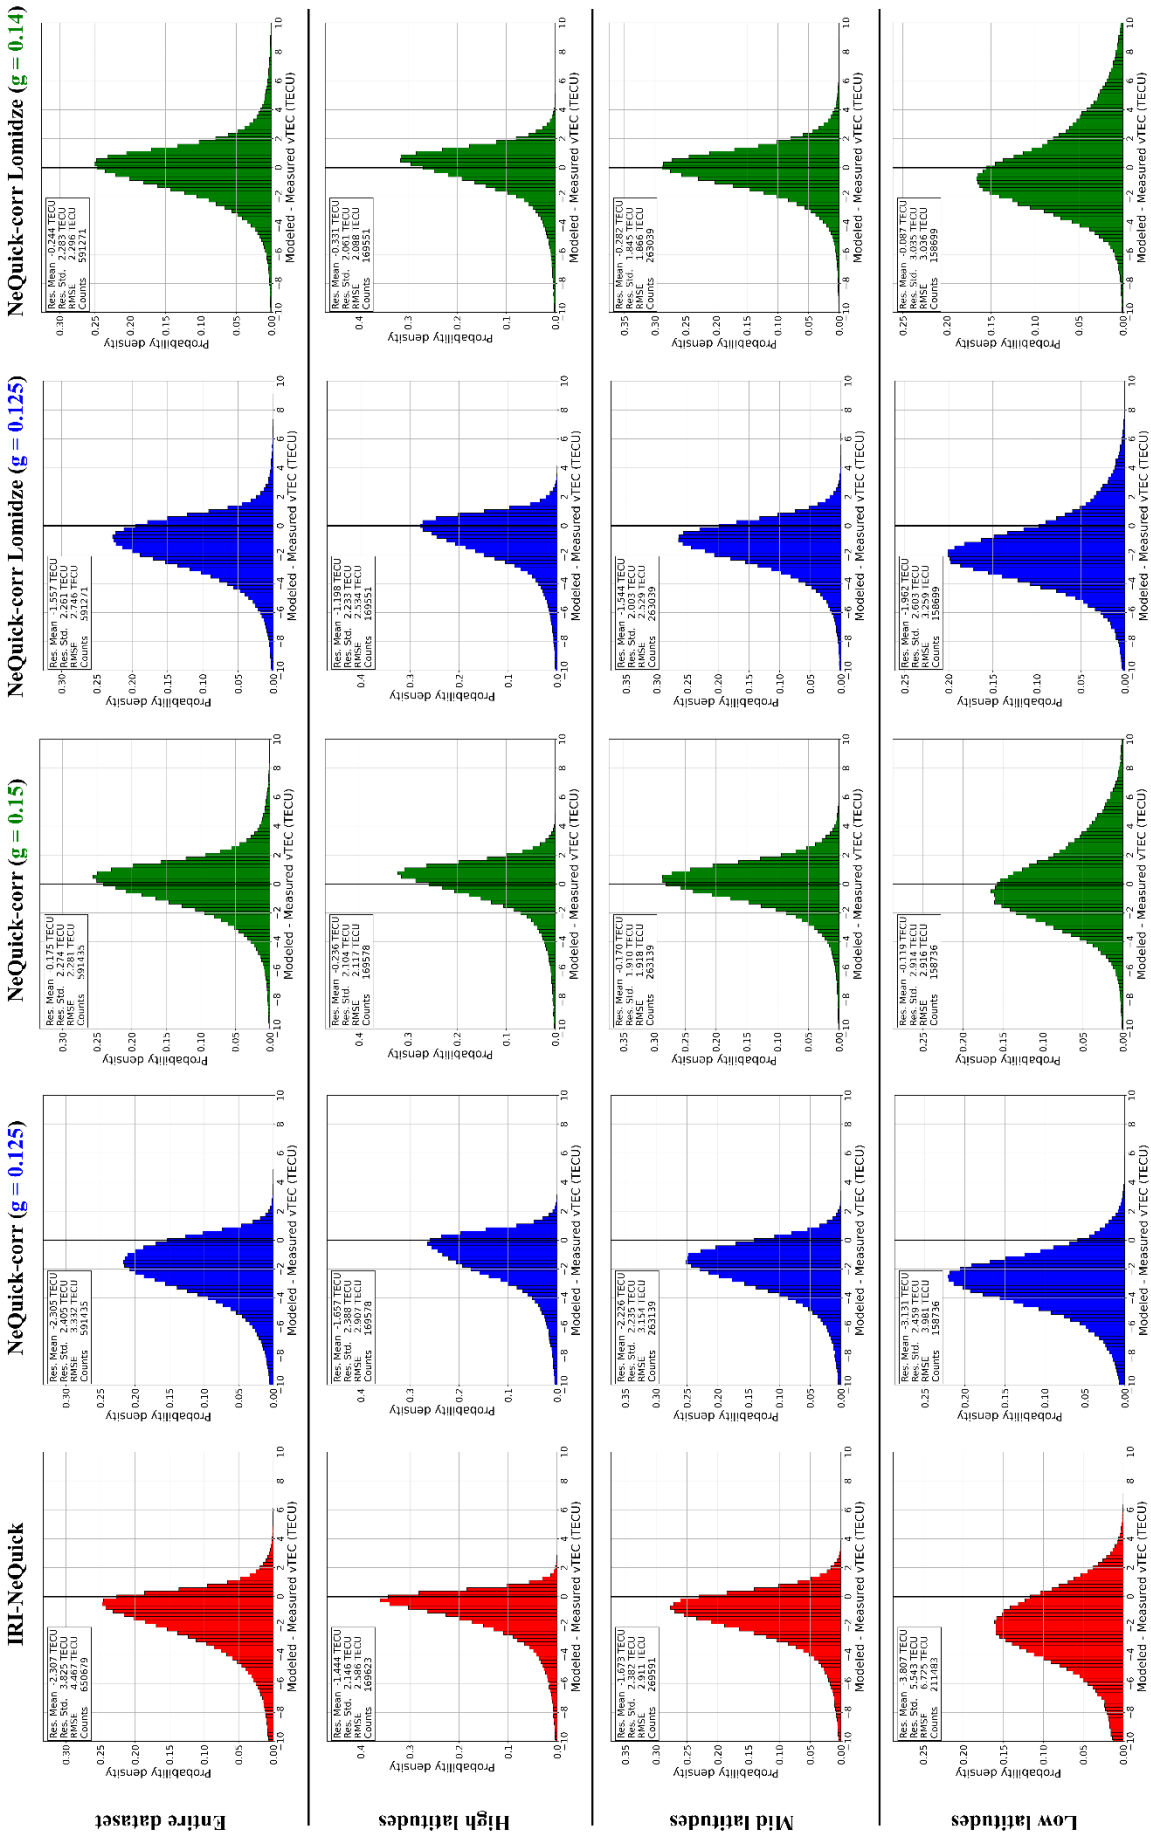

**Figure S23.** Distributions of residuals between measured and modeled vTEC values for 2011. Measured values are those from the GRACE mission. Modeled values are those from the five NeQuick topside descriptions considered in the study. In the upper left corner of each plot, the residuals mean, the residuals standard deviation, the RMSE and the counts are visible. The NeQuick-corr options (with  $g = 0.15$  and  $0.14$ ) reduce the underestimation of VTEC compared to the options with  $g = 0.125$  (green versus blue histograms).

## COSMIC-1 vTEC dataset, year 2011, histograms of residuals between measured and modeled data

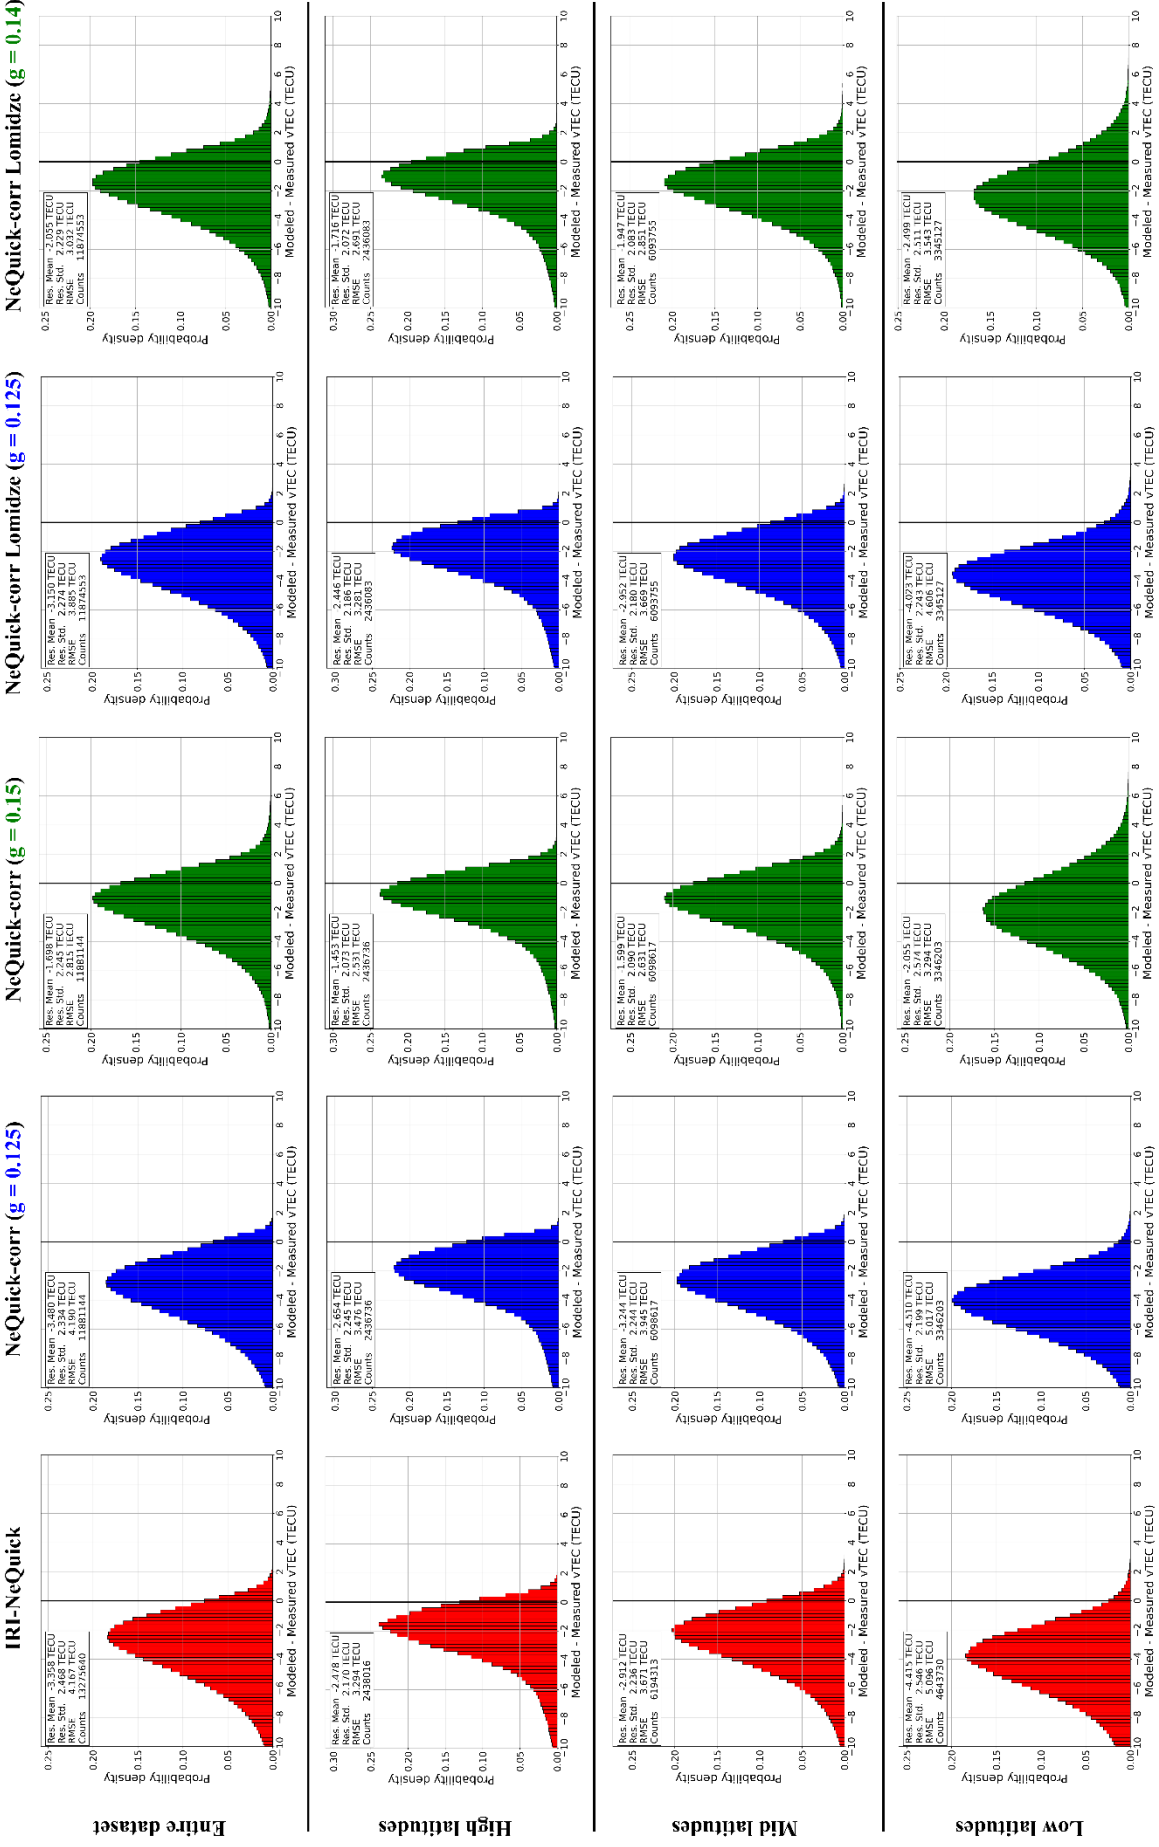

**Figure S24.** Distributions of residuals between measured and modeled vTEC values for 2011. Measured values are those from the COSMIC-1 mission. Modeled values are those from the five NeQuick topside descriptions considered in the study. In the upper left corner of each plot, the residuals mean, the residuals standard deviation, the RMSE and the counts are visible. The NeQuick-corr options (with  $g = 0.15$  and  $0.14$ ) reduce the underestimation of VTEC compared to the options with  $g = 0.125$  (green versus blue histograms).

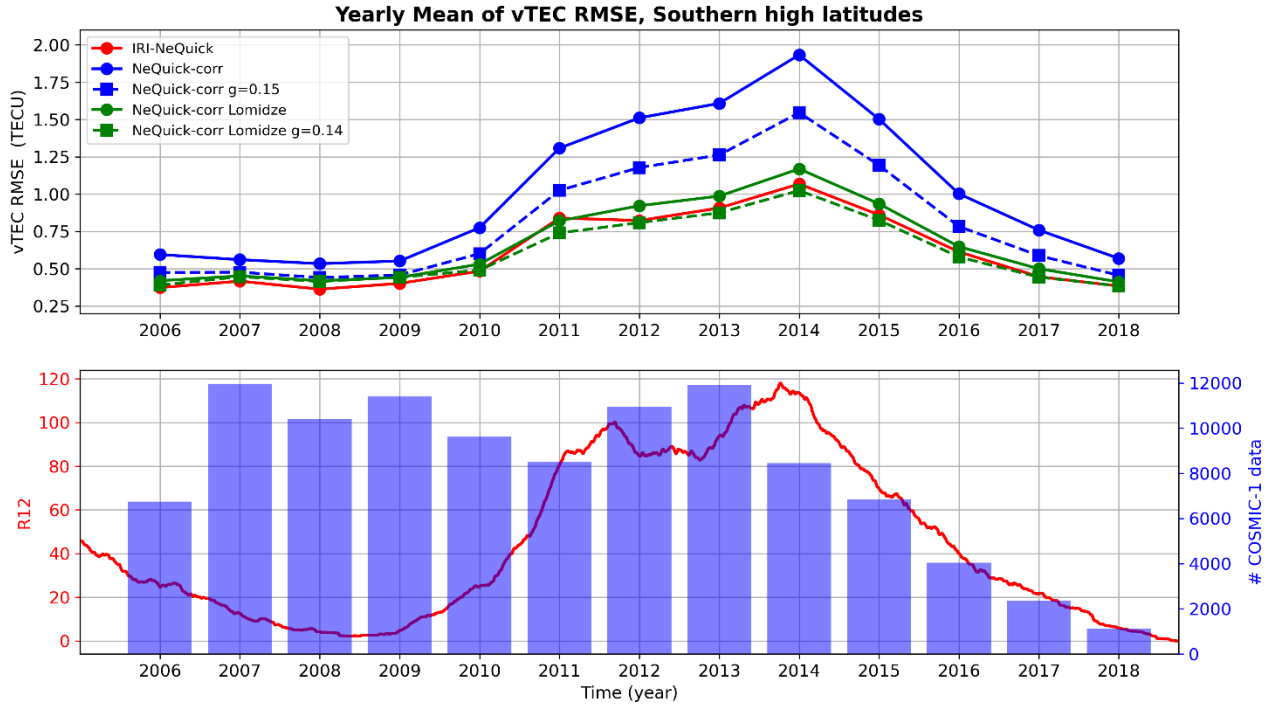

**Figure S25.** Yearly mean of RMSE for Southern high latitudes between (red dots) the IRI-NeQuick model and COSMIC-1 derived vTEC values, between (blue dots) the NeQuick-corr model and COSMIC-1 derived vTEC values, between (blue squares) the NeQuick-corr( $g = 0.15$ ) model and COSMIC-1 derived vTEC values, between (green dots) the NeQuick-corr Lomidze model and COSMIC-1 derived vTEC values, and between (green squares) the NeQuick-corr( $g = 0.14$ ) model and COSMIC-1 derived vTEC values. The  $R_{12}$  solar activity index as well as the number of COSMIC-1 RO data considered for each year are also reported.



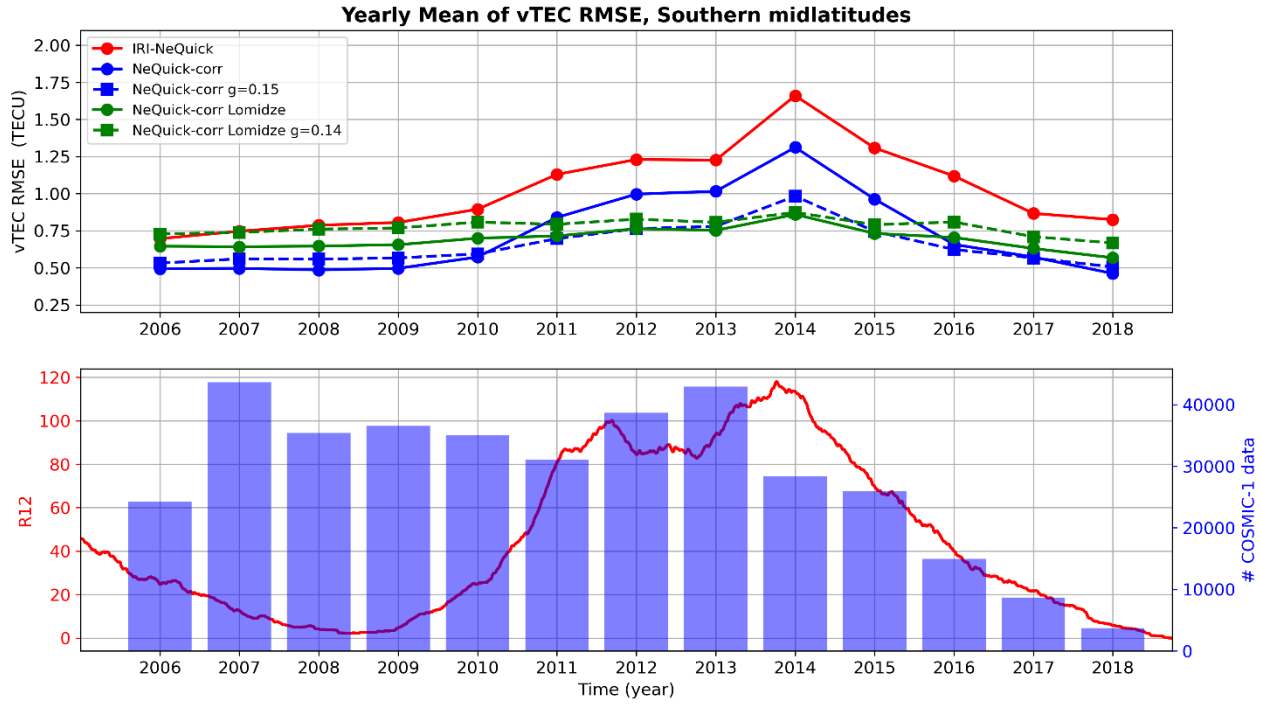

**Figure S26.** Yearly mean of RMSE for Southern middle latitudes between (red dots) the IRI-NeQuick model and COSMIC-1 derived vTEC values, between (blue dots) the NeQuick-corr model and COSMIC-1 derived vTEC values, between (blue squares) the NeQuick-corr( $g = 0.15$ ) model and COSMIC-1 derived vTEC values, between (green dots) the NeQuick-corr Lomidze model and COSMIC-1 derived vTEC values, and between (green squares) the NeQuick-corr( $g = 0.14$ ) model and COSMIC-1 derived vTEC values. The  $R_{12}$  solar activity index as well as the number of COSMIC-1 RO data considered for each year are also reported.
